# Supplementary material
Source: PubMed Central journal article supplement (PMC5924921)
Supplement: pnas.201721469SI.pdf [file pnas.201721469SI.pdf]

# Supporting Information

Li et al. 10.1073/pnas.1721469115

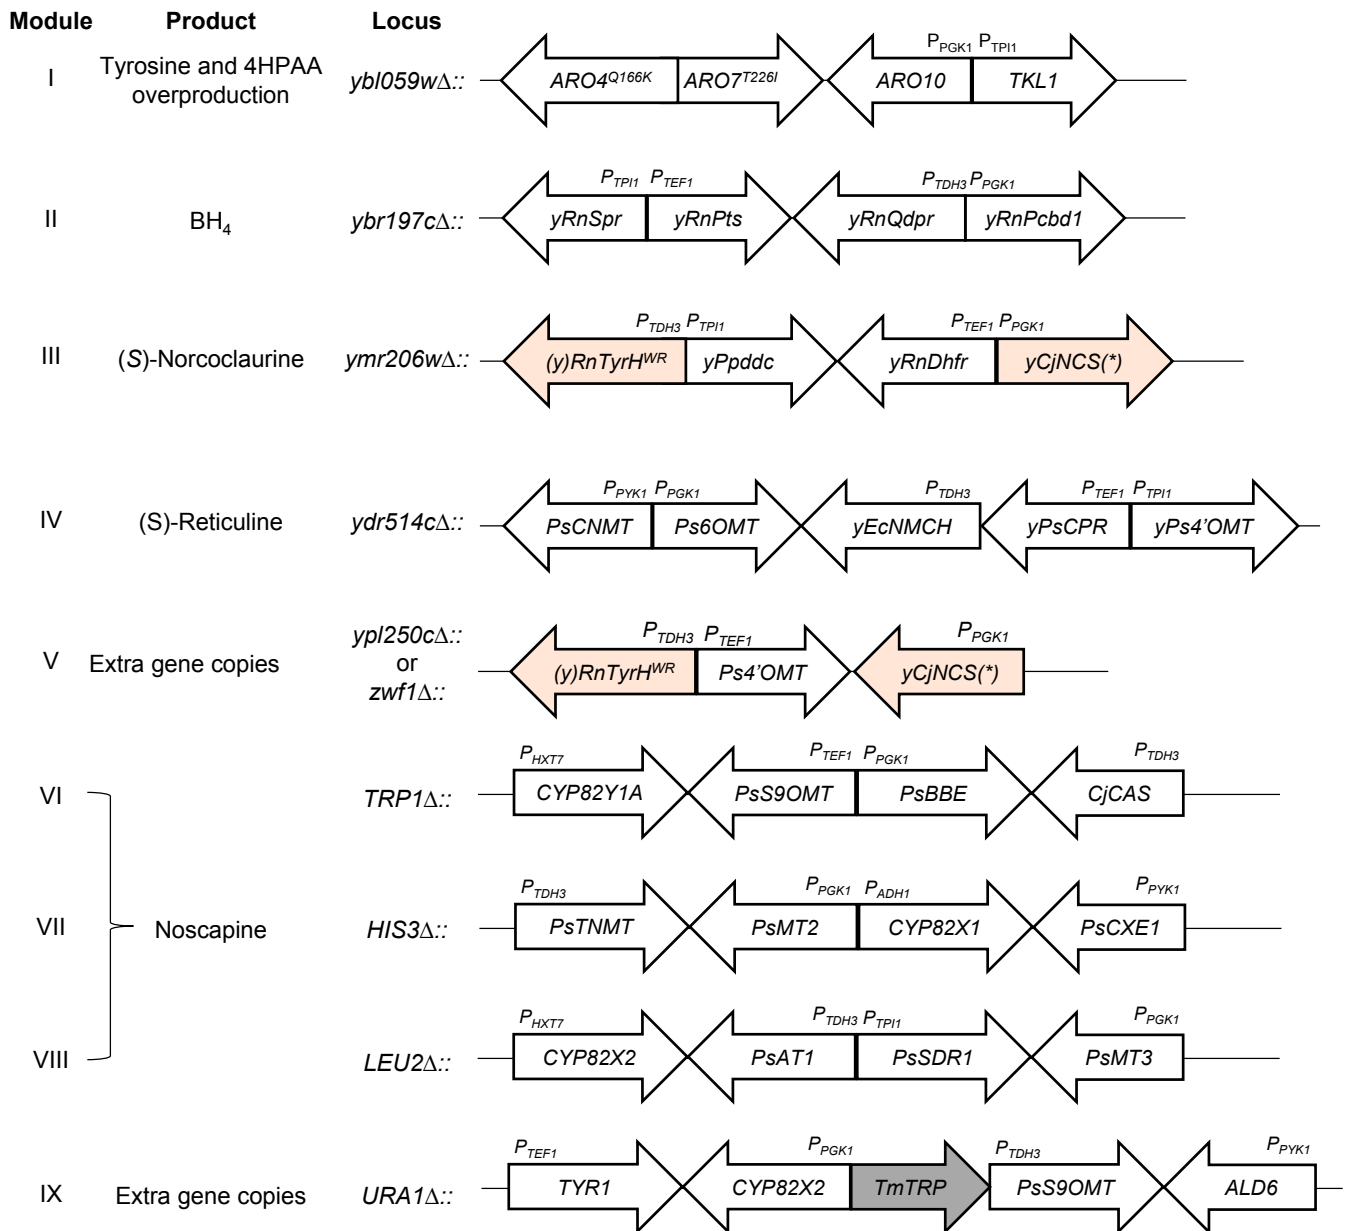

**Fig. S1.** Genetic design of pathway modules for yeast strain construction. Modules are designed to integrate into one of six chromosomal loci in the yeast genome. White block arrows indicate gene expression cassettes with a promoter, coding sequence, and terminator. Gray block arrows indicate loxP flanked selection markers. Orange block arrows indicate gene expression cassettes that encode for genes applied for gene modification during optimization process. For nonyeast enzymes, codon optimization is indicated by a leading "y," and the source genus and species are designated by the two letters immediately preceding the gene symbol. Asterisk indicates the N-terminal modification of CjNCS. See Tables S1 and S2 for expression cassette, strain number, genome assembly primers, and synthetic coding sequences.

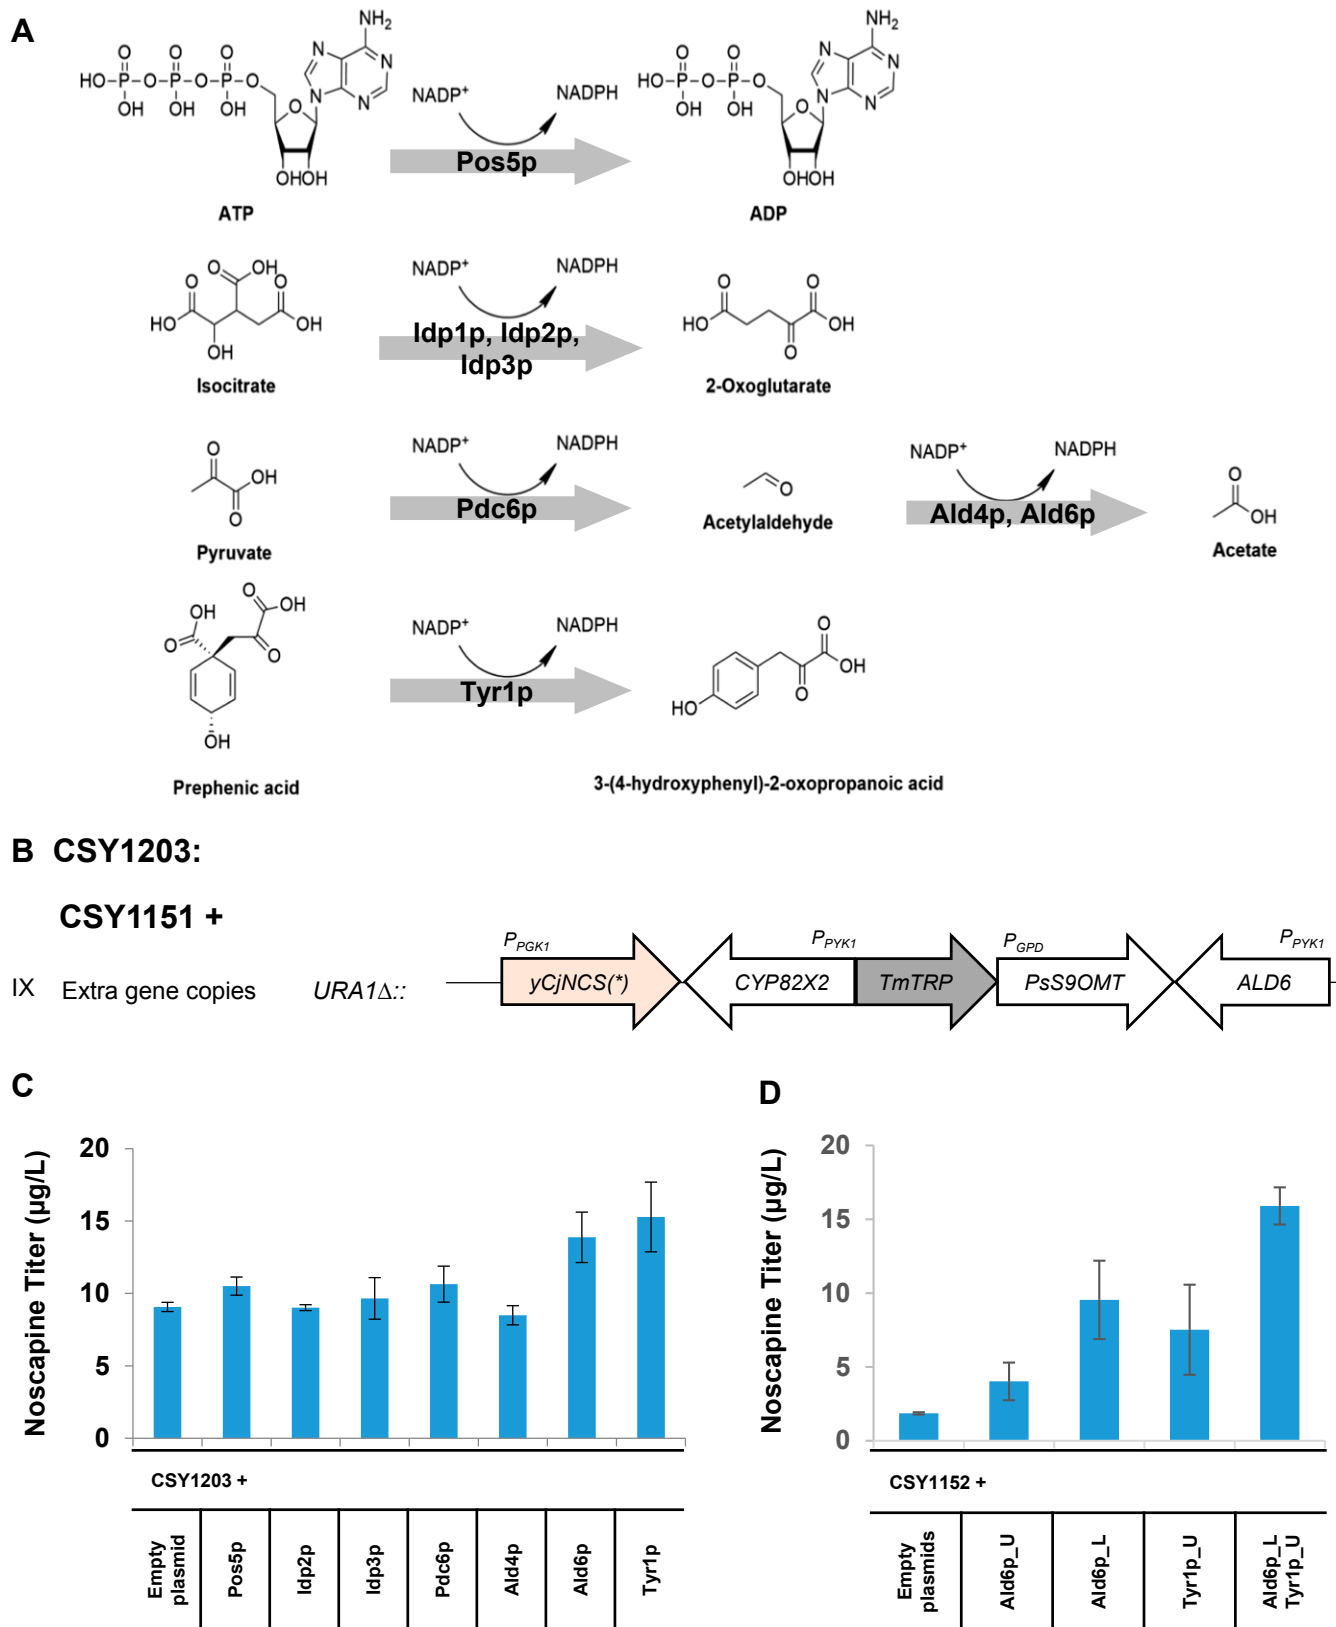

**Fig. S2.** Turning NADPH supply for higher noscapine titer. (A) Regeneration mechanism of selected *S. cerevisiae* endogenous enzymes: Pos5p, mitochondrial NADH kinase; Idp1p, Idp2p, and Idp3p, isocitrate dehydrogenase; Pdc6p, pyruvate decarboxylase; Ald4p and Ald6p, aldehyde dehydrogenase; Tyr1p, prephenate dehydrogenase. (B) Genotype of CSY1203. (C) Noscapine titer from CSY1203 expressing different NADPH regeneration enzymes. (D) Noscapine titer from CSY1152 expressing Ald6p, Tyr1p, or Ald6p and Tyr1p together. *S. cerevisiae* endogenous genes were expressed from a low-copy plasmid in CSY1203 and CSY1152. ALD6 was expressed from a low-copy plasmid harboring the selection marker LEU (Ald6p\_L) or URA (Ald6p\_U). TYR1 was expressed from a low-copy plasmid harboring the selection marker URA (Tyr1p\_U) (Table S1). All strains were cultured in SD with 2% dextrose, in the presence of 10 mM ascorbic acid at 25 °C for 72 h. Error bars represent SD of three biological replicates.

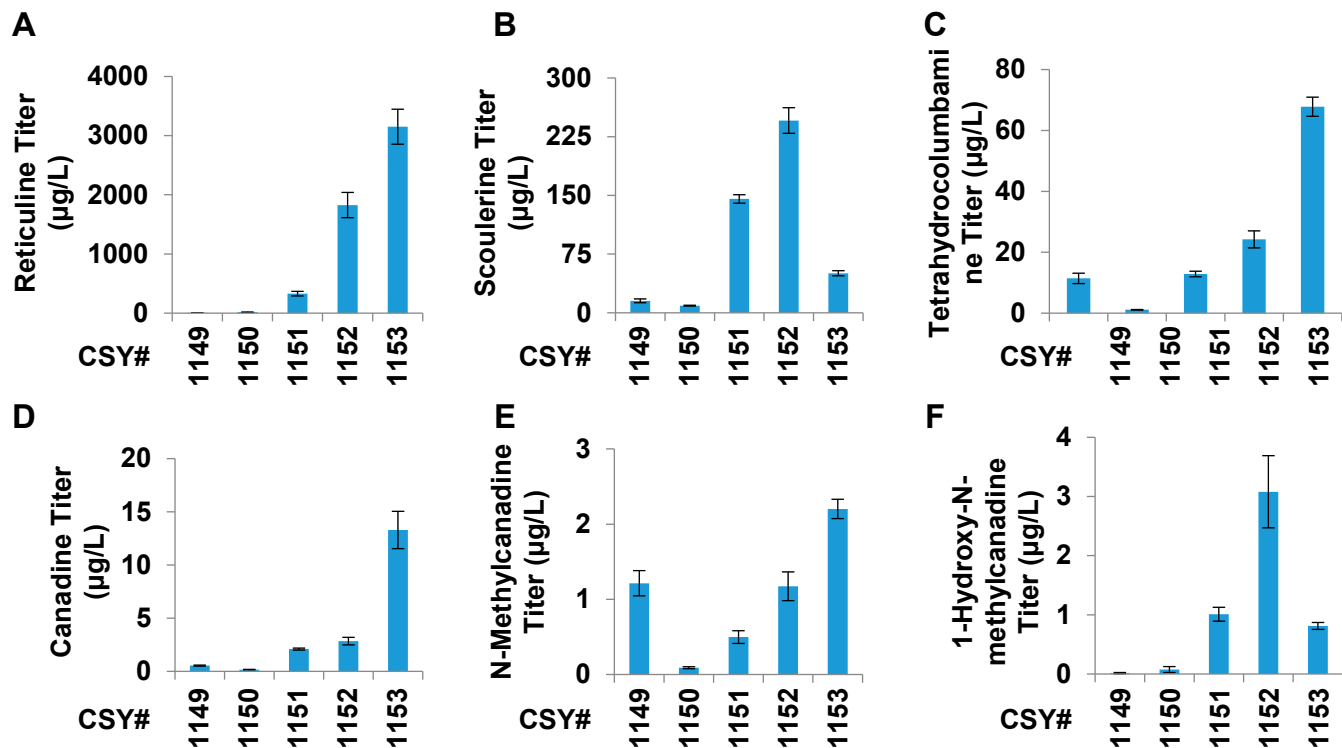

Fig. S3. Titer of (A) reticuline, (B) scoulerine, (C) tetrahydrocolumbamine, (D) canadine, (E) *N*-methylcanadine, and (F) 1-hydroxy-*N*-methylcanadine from engineered yeast strains. All strains were cultured in SD with 2% dextrose, in the presence of 10 mM ascorbic acid at 25 °C for 72 h. Error bars represent SD of three biological replicates.

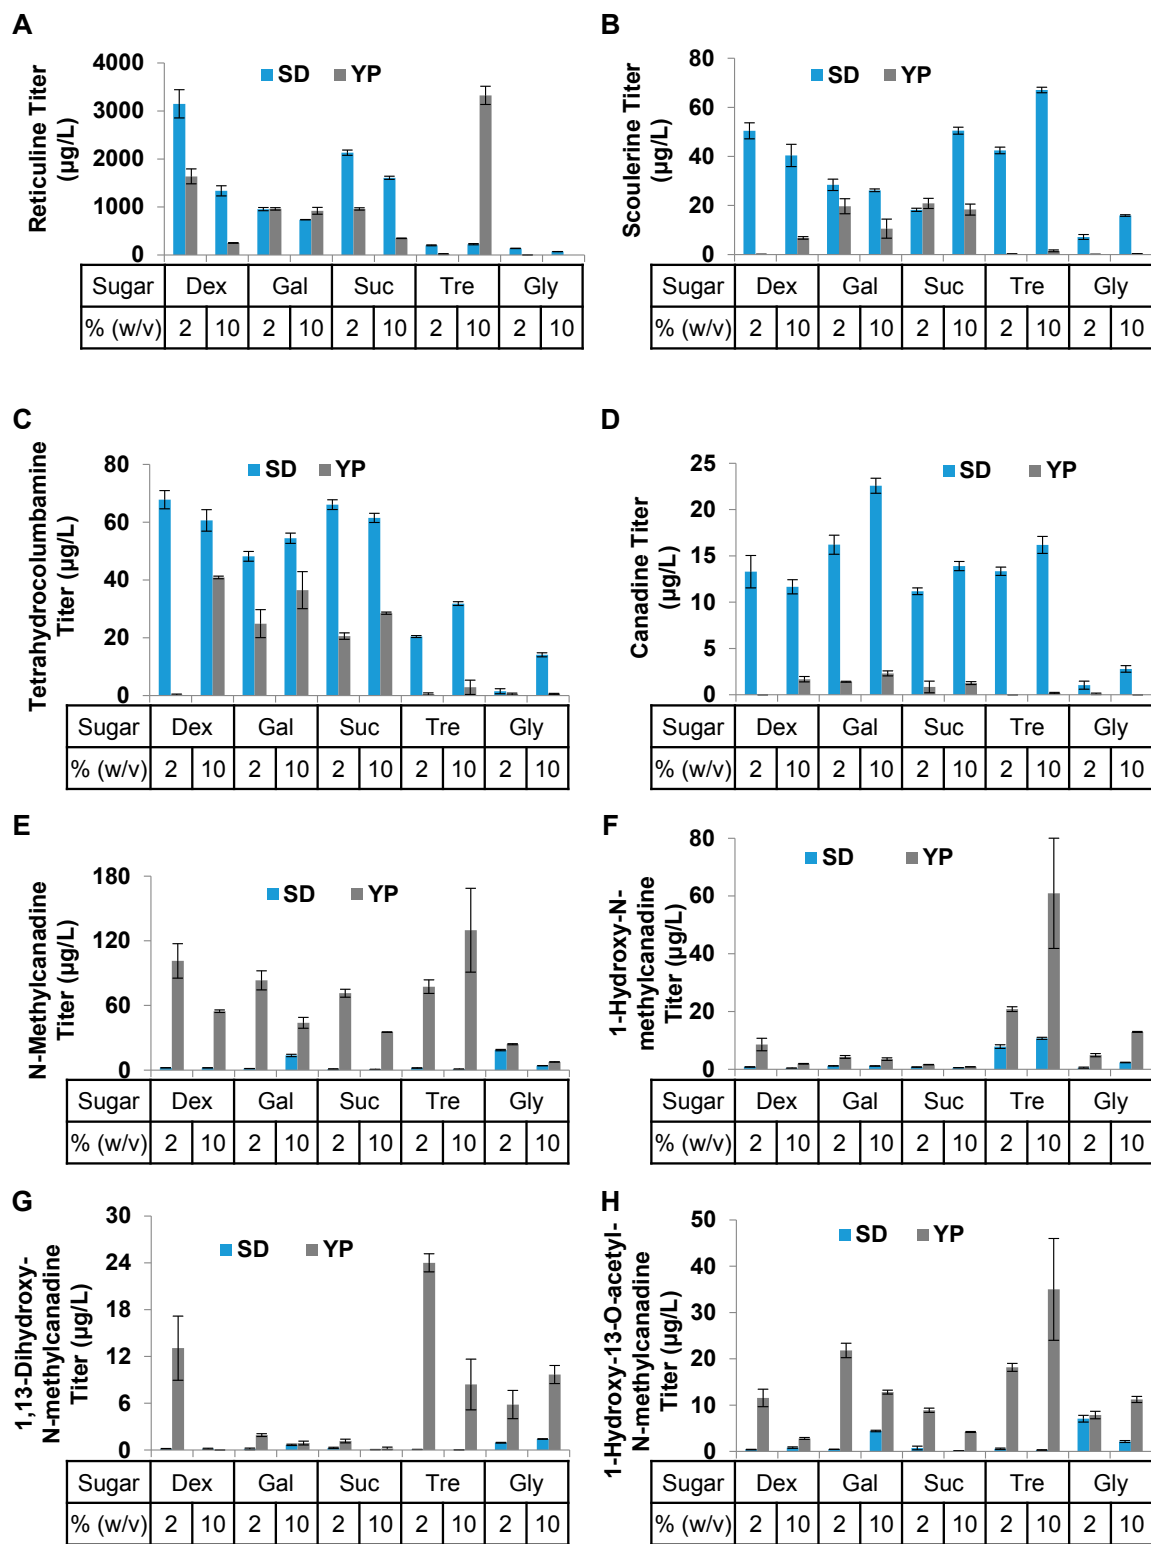

**Fig. S4.** Titer of (A) reticulline, (B) scoulerine, (C) tetrahydrocolumbamine, (D) canadine, (E) *N*-methylcanadine, (F) 1-hydroxy-*N*-methylcanadine, (G) 1,13-dihydroxy-*N*-methylcanadine, and (H) 1-hydroxy-13-O-acetyl-*N*-methylcanadine from engineered yeast strains in different base medium and carbon sources. Base media are SD (synthetic defined) and YP (yeast extract and peptone). Carbon sources are 2% or 10% of dextrose, galactose, sucrose, trehalose, and glycerol. All noscapine titers were obtained from CSY1153 cultured at 25 °C for 72 h in the presence of 10 mM ascorbic acid. Error bars represent SD of at least three biological replicates.

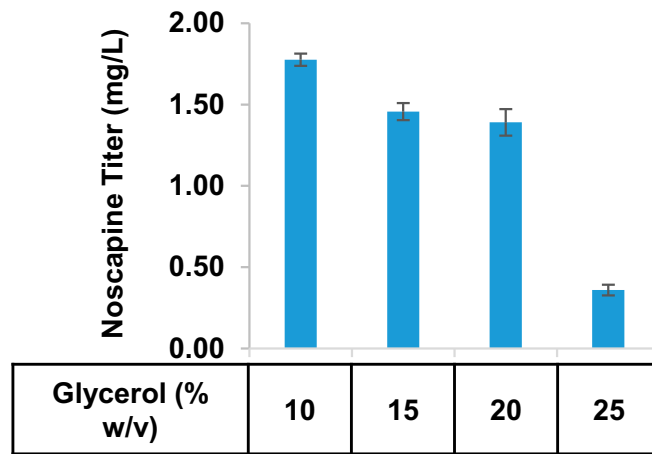

**Fig. S5.** Noscapine titers from CSY1153 under high glycerol concentrations. The 10%, 15%, 20%, or 25% glycerol were supplemented into YP with 2% dextrose. The strain was cultured at 25 °C for 72 h in the indicated media composition with 10 mM ascorbic acid. Error bars represent SD of three biological replicates.

**Table S1. Engineered *S. cerevisiae* strains and yeast expression constructs used in this study**

| Strain  | Plasmid no. | Fig.                   | x-axis label | Plasmid-based constructs | Genome modifications                                                                                                                                                                                                                                                                                                                                                                                                                                                                                                                                                                                                                                                                                                                                                                                                                                                                                                                                                                                                                                                                                                                                                                                                                                                                                                                                                                                                                                            |
|---------|-------------|------------------------|--------------|--------------------------|-----------------------------------------------------------------------------------------------------------------------------------------------------------------------------------------------------------------------------------------------------------------------------------------------------------------------------------------------------------------------------------------------------------------------------------------------------------------------------------------------------------------------------------------------------------------------------------------------------------------------------------------------------------------------------------------------------------------------------------------------------------------------------------------------------------------------------------------------------------------------------------------------------------------------------------------------------------------------------------------------------------------------------------------------------------------------------------------------------------------------------------------------------------------------------------------------------------------------------------------------------------------------------------------------------------------------------------------------------------------------------------------------------------------------------------------------------------------|
| CSY1060 |             |                        |              |                          | <i>ybr197cΔ::P<sub>TPH1</sub>-yRnSpr-T<sub>STE2</sub>, P<sub>TEF1</sub>-yRnPts-T<sub>CYC1</sub>, P<sub>GPD</sub>-yRnQdpr-T<sub>ADH1</sub>, P<sub>PGK1</sub>-yRnPcbd1-T<sub>PHOS</sub>; ydr514cΔ::P<sub>PYK1</sub>-PsCNMT-T<sub>MFA1</sub>, P<sub>PGK1</sub>-Ps6OMT-T<sub>PHOS</sub>, P<sub>TDH3</sub>-yEcNMCH-T<sub>ADH1</sub>, P<sub>TEF1</sub>-yPsCPR-T<sub>CYC1</sub>, P<sub>TPH1</sub>-yPs4'OMT-T<sub>STE2</sub>; ymr206wΔ::P<sub>GPD</sub>-Rntyrrh<sup>WR</sup>-T<sub>ADH1</sub>, P<sub>TPH1</sub>-yPpddc-T<sub>STE2</sub>, P<sub>TEF1</sub>-yRnDhfr-T<sub>CYC1</sub>, P<sub>PGK1</sub>-yCjNCS-T<sub>PHOS</sub>; ybl059wΔ::ARO4<sup>Q166K</sup>, ARO7<sup>T226I</sup>, P<sub>TEF1</sub>-ARO10-T<sub>CYC1</sub>, P<sub>TDH3</sub>-TKL1-T<sub>ADH1</sub>; ypl250cΔ::P<sub>GPD</sub>-Rntyrrh<sup>WR</sup>-T<sub>ADH1</sub>, P<sub>TEF1</sub>-Ps4'OMT-T<sub>CYC1</sub>, P<sub>PGK1</sub>-yCjNCS-T<sub>PHOS</sub></i>                                                                                                                                                                                                                                                                                                                                                                                                                                                                                                                                           |
| CSY1061 |             |                        |              |                          | <i>ybr197cΔ::P<sub>TPH1</sub>-yRnSpr-T<sub>STE2</sub>, P<sub>TEF1</sub>-yRnPts-T<sub>CYC1</sub>, P<sub>GPD</sub>-yRnQdpr-T<sub>ADH1</sub>, P<sub>PGK1</sub>-yRnPcbd1-T<sub>PHOS</sub>; ydr514cΔ::P<sub>PYK1</sub>-PsCNMT-T<sub>MFA1</sub>, P<sub>PGK1</sub>-Ps6OMT-T<sub>PHOS</sub>, P<sub>TDH3</sub>-yEcNMCH-T<sub>ADH1</sub>, P<sub>TEF1</sub>-yPsCPR-T<sub>CYC1</sub>, P<sub>TPH1</sub>-yPs4'OMT-T<sub>STE2</sub>; ymr206wΔ::P<sub>GPD</sub>-Rntyrrh<sup>WR</sup>-T<sub>ADH1</sub>, P<sub>TPH1</sub>-yPpddc-T<sub>STE2</sub>, P<sub>TEF1</sub>-yRnDhfr-T<sub>CYC1</sub>, P<sub>PGK1</sub>-yCjNCS-T<sub>PHOS</sub>; ybl059wΔ::ARO4<sup>Q166K</sup>, ARO7<sup>T226I</sup>, P<sub>TEF1</sub>-ARO10-T<sub>CYC1</sub>, P<sub>TDH3</sub>-TKL1-T<sub>ADH1</sub>; zwf1Δ::P<sub>GPD</sub>-Rntyrrh<sup>WR</sup>-T<sub>ADH1</sub>, P<sub>TEF1</sub>-Ps4'OMT-T<sub>CYC1</sub>, P<sub>PGK1</sub>-yCjNCS-T<sub>PHOS</sub></i>                                                                                                                                                                                                                                                                                                                                                                                                                                                                                                                                              |
| CSY1149 |             | 2A and S4              |              |                          | <i>ybr197cΔ::P<sub>TPH1</sub>-yRnSpr-T<sub>STE2</sub>, P<sub>TEF1</sub>-yRnPts-T<sub>CYC1</sub>, P<sub>GPD</sub>-yRnQdpr-T<sub>ADH1</sub>, P<sub>PGK1</sub>-yRnPcbd1-T<sub>PHOS</sub>; ydr514cΔ::P<sub>PYK1</sub>-PsCNMT-T<sub>MFA1</sub>, P<sub>PGK1</sub>-Ps6OMT-T<sub>PHOS</sub>, P<sub>TDH3</sub>-yEcNMCH-T<sub>ADH1</sub>, P<sub>TEF1</sub>-yPsCPR-T<sub>CYC1</sub>, P<sub>TPH1</sub>-yPs4'OMT-T<sub>STE2</sub>; ymr206wΔ::P<sub>GPD</sub>-Rntyrrh<sup>WR</sup>-T<sub>ADH1</sub>, P<sub>TPH1</sub>-yPpddc-T<sub>STE2</sub>, P<sub>TEF1</sub>-yRnDhfr-T<sub>CYC1</sub>, P<sub>PGK1</sub>-yCjNCS-T<sub>PHOS</sub>; ybl059wΔ::ARO4<sup>Q166K</sup>, ARO7<sup>T226I</sup>, P<sub>TEF1</sub>-ARO10-T<sub>CYC1</sub>, P<sub>TDH3</sub>-TKL1-T<sub>ADH1</sub>; zwf1Δ::P<sub>GPD</sub>-Rntyrrh<sup>WR</sup>-T<sub>ADH1</sub>, P<sub>TEF1</sub>-Ps4'OMT-T<sub>CYC1</sub>, P<sub>PGK1</sub>-yCjNCS-T<sub>PHOS</sub>; trp1Δ::P<sub>HXT7</sub>-CYP82Y1A-T<sub>PGK1</sub>, P<sub>TEF1</sub>-PsS9OMT-T<sub>CYC1</sub>, P<sub>PGK1</sub>-PsBBE-T<sub>PHOS</sub>, P<sub>GPD</sub>-CjCAS-T<sub>ADH1</sub>; HIS3Δ::P<sub>GPD</sub>-PsTNMT-T<sub>CYC1</sub>, P<sub>PGK1</sub>-PsMT2-T<sub>PHOS</sub>, P<sub>ADH1</sub>-CYP82X1-T<sub>GAP1</sub>, P<sub>PYK1</sub>-PsCXE1-T<sub>MFA1</sub>; leu2Δ::P<sub>HXT7</sub>-CYP82X2-T<sub>CYC1</sub>, P<sub>GPD</sub>-PsAT1-T<sub>ADH1</sub>, P<sub>TPH1</sub>-PsSDR1-T<sub>STE2</sub>, P<sub>PGK1</sub>-PsMT3-T<sub>PHOS</sub></i>    |
| CSY1150 |             | 1 B, ii, and 2A and S4 |              |                          | <i>ybr197cΔ::P<sub>TPH1</sub>-yRnSpr-T<sub>STE2</sub>, P<sub>TEF1</sub>-yRnPts-T<sub>CYC1</sub>, P<sub>GPD</sub>-yRnQdpr-T<sub>ADH1</sub>, P<sub>PGK1</sub>-yRnPcbd1-T<sub>PHOS</sub>; ydr514cΔ::P<sub>PYK1</sub>-PsCNMT-T<sub>MFA1</sub>, P<sub>PGK1</sub>-Ps6OMT-T<sub>PHOS</sub>, P<sub>TDH3</sub>-yEcNMCH-T<sub>ADH1</sub>, P<sub>TEF1</sub>-yPsCPR-T<sub>CYC1</sub>, P<sub>TPH1</sub>-yPs4'OMT-T<sub>STE2</sub>; ymr206wΔ::P<sub>GPD</sub>-Rntyrrh<sup>WR</sup>-T<sub>ADH1</sub>, P<sub>TPH1</sub>-yPpddc-T<sub>STE2</sub>, P<sub>TEF1</sub>-yRnDhfr-T<sub>CYC1</sub>, P<sub>PGK1</sub>-yCjNCS-T<sub>PHOS</sub>; ybl059wΔ::ARO4<sup>Q166K</sup>, ARO7<sup>T226I</sup>, P<sub>TEF1</sub>-ARO10-T<sub>CYC1</sub>, P<sub>TDH3</sub>-TKL1-T<sub>ADH1</sub>; ypl250cΔ::P<sub>GPD</sub>-Rntyrrh<sup>WR</sup>-T<sub>ADH1</sub>, P<sub>TEF1</sub>-Ps4'OMT-T<sub>CYC1</sub>, P<sub>PGK1</sub>-yCjNCS-T<sub>PHOS</sub>; trp1Δ::P<sub>HXT7</sub>-CYP82Y1A-T<sub>PGK1</sub>, P<sub>TEF1</sub>-PsS9OMT-T<sub>CYC1</sub>, P<sub>PGK1</sub>-PsBBE-T<sub>PHOS</sub>, P<sub>GPD</sub>-CjCAS-T<sub>ADH1</sub>; HIS3Δ::P<sub>GPD</sub>-PsTNMT-T<sub>CYC1</sub>, P<sub>PGK1</sub>-PsMT2-T<sub>PHOS</sub>, P<sub>ADH1</sub>-CYP82X1-T<sub>GAP1</sub>, P<sub>PYK1</sub>-PsCXE1-T<sub>MFA1</sub>; leu2Δ::P<sub>HXT7</sub>-CYP82X2-T<sub>CYC1</sub>, P<sub>GPD</sub>-PsAT1-T<sub>ADH1</sub>, P<sub>TPH1</sub>-PsSDR1-T<sub>STE2</sub>, P<sub>PGK1</sub>-PsMT3-T<sub>PHOS</sub></i> |

**Table S1. Cont.**

| Strain  | Plasmid no.                    | Fig.      | x-axis label     | Plasmid-based constructs                                                                               | Genome modifications                                                                                                                                                                                                                                                                                                                                                                                                                                                                                                                                                                                                                                                                                                                                                                                                                                                                                                                                                                                                                                                                                                                                                                                                                                                                                                                                                                                                                                                                                                                         |
|---------|--------------------------------|-----------|------------------|--------------------------------------------------------------------------------------------------------|----------------------------------------------------------------------------------------------------------------------------------------------------------------------------------------------------------------------------------------------------------------------------------------------------------------------------------------------------------------------------------------------------------------------------------------------------------------------------------------------------------------------------------------------------------------------------------------------------------------------------------------------------------------------------------------------------------------------------------------------------------------------------------------------------------------------------------------------------------------------------------------------------------------------------------------------------------------------------------------------------------------------------------------------------------------------------------------------------------------------------------------------------------------------------------------------------------------------------------------------------------------------------------------------------------------------------------------------------------------------------------------------------------------------------------------------------------------------------------------------------------------------------------------------|
| CSY1151 |                                | 2A and S4 |                  |                                                                                                        | <i>ybr197cΔ::P<sub>TPH1</sub>-yRnSpr-T<sub>STE2</sub>, P<sub>TEF1</sub>-yRnPts-T<sub>CYC1</sub>, P<sub>GPD</sub>-yRnQdpr-T<sub>ADH1</sub>, P<sub>PGK1</sub>-yRnPcbd1-T<sub>PHOS</sub>; ydr514cΔ::P<sub>PYK1</sub>-P<sub>SCNMT</sub>-T<sub>MFA1</sub>, P<sub>PGK1</sub>-P<sub>S6OMT</sub>-T<sub>PHOS</sub>, P<sub>TDH3</sub>-yEcNMCH-T<sub>ADH1</sub>, P<sub>TEF1</sub>-yPsCPR-T<sub>CYC1</sub>, P<sub>TPH1</sub>-yPs4' OMT-T<sub>STE2</sub>; ymr206wΔ::P<sub>GPD</sub>-Rnryrh<sup>WR</sup>-T<sub>ADH1</sub>, P<sub>TPH1</sub>-yPpddc-T<sub>STE2</sub>, P<sub>TEF1</sub>-yRnDhfr-T<sub>CYC1</sub>, P<sub>PGK1</sub>-truncated-yCjNCS-T<sub>PHOS</sub>; ybl059wΔ::ARO4<sup>Q166K</sup>, ARO7<sup>T226I</sup>, P<sub>TEF1</sub>-ARO10-T<sub>CYC1</sub>, P<sub>TDH3</sub>-TKL1-T<sub>ADH1</sub>; ypl250cΔ::P<sub>GPD</sub>-Rnryrh<sup>WR</sup>-T<sub>ADH1</sub>, P<sub>TEF1</sub>-Ps4' OMT-T<sub>CYC1</sub>, P<sub>PGK1</sub>-truncated-yCjNCS-T<sub>PHOS</sub>; trp1Δ::P<sub>HXT7</sub>-CYP82Y1A-T<sub>PGK1</sub>, P<sub>TEF1</sub>-PsS9OMT-T<sub>CYC1</sub>, P<sub>PGK1</sub>-PsBBE-T<sub>PHOS</sub>, P<sub>GPD</sub>-CJCAS-T<sub>ADH1</sub>; HIS3Δ::P<sub>GPD</sub>-P<sub>STNMT</sub>-T<sub>CYC1</sub>, P<sub>PGK1</sub>-P<sub>SMT2</sub>-T<sub>PHOS</sub>, P<sub>ADH1</sub>-CYP82X1-T<sub>GAP1</sub>, P<sub>PYK1</sub>-P<sub>SCXE1</sub>-T<sub>MFA1</sub>; leu2Δ::P<sub>HXT7</sub>-CYP82X2-T<sub>CYC1</sub>, P<sub>GPD</sub>-PsAT1-T<sub>ADH1</sub>, P<sub>TPH1</sub>-PsSDR1-T<sub>STE2</sub>, P<sub>PGK1</sub>-PsMT3-T<sub>PHOS</sub></i>   |
| CSY1152 |                                | 2A and S4 |                  |                                                                                                        | <i>ybr197cΔ::P<sub>TPH1</sub>-yRnSpr-T<sub>STE2</sub>, P<sub>TEF1</sub>-yRnPts-T<sub>CYC1</sub>, P<sub>GPD</sub>-yRnQdpr-T<sub>ADH1</sub>, P<sub>PGK1</sub>-yRnPcbd1-T<sub>PHOS</sub>; ydr514cΔ::P<sub>PYK1</sub>-P<sub>SCNMT</sub>-T<sub>MFA1</sub>, P<sub>PGK1</sub>-P<sub>S6OMT</sub>-T<sub>PHOS</sub>, P<sub>TDH3</sub>-yEcNMCH-T<sub>ADH1</sub>, P<sub>TEF1</sub>-yPsCPR-T<sub>CYC1</sub>, P<sub>TPH1</sub>-yPs4' OMT-T<sub>STE2</sub>; ymr206wΔ::P<sub>GPD</sub>-yRnryrh<sup>WR</sup>-T<sub>ADH1</sub>, P<sub>TPH1</sub>-yPpddc-T<sub>STE2</sub>, P<sub>TEF1</sub>-yRnDhfr-T<sub>CYC1</sub>, P<sub>PGK1</sub>-truncated-yCjNCS-T<sub>PHOS</sub>; ybl059wΔ::ARO4<sup>Q166K</sup>, ARO7<sup>T226I</sup>, P<sub>TEF1</sub>-ARO10-T<sub>CYC1</sub>, P<sub>TDH3</sub>-TKL1-T<sub>ADH1</sub>; ypl250cΔ::P<sub>GPD</sub>-yRnryrh<sup>WR</sup>-T<sub>ADH1</sub>, P<sub>TEF1</sub>-Ps4' OMT-T<sub>CYC1</sub>, P<sub>PGK1</sub>-truncated-yCjNCS-T<sub>PHOS</sub>; trp1Δ::P<sub>HXT7</sub>-CYP82Y1A-T<sub>PGK1</sub>, P<sub>TEF1</sub>-PsS9OMT-T<sub>CYC1</sub>, P<sub>PGK1</sub>-PsBBE-T<sub>PHOS</sub>, P<sub>GPD</sub>-CJCAS-T<sub>ADH1</sub>; HIS3Δ::P<sub>GPD</sub>-P<sub>STNMT</sub>-T<sub>CYC1</sub>, P<sub>PGK1</sub>-P<sub>SMT2</sub>-T<sub>PHOS</sub>, P<sub>ADH1</sub>-CYP82X1-T<sub>GAP1</sub>, P<sub>PYK1</sub>-P<sub>SCXE1</sub>-T<sub>MFA1</sub>; leu2Δ::P<sub>HXT7</sub>-CYP82X2-T<sub>CYC1</sub>, P<sub>GPD</sub>-PsAT1-T<sub>ADH1</sub>, P<sub>TPH1</sub>-PsSDR1-T<sub>STE2</sub>, P<sub>PGK1</sub>-PsMT3-T<sub>PHOS</sub></i> |
| CSY1152 | pAG416GPD-ccdB                 | 2B        | Control          | <i>P<sub>GPD</sub>-ccdB-T<sub>CYC1</sub>-URA1</i>                                                      |                                                                                                                                                                                                                                                                                                                                                                                                                                                                                                                                                                                                                                                                                                                                                                                                                                                                                                                                                                                                                                                                                                                                                                                                                                                                                                                                                                                                                                                                                                                                              |
| CSY1152 | pCS3645                        | 2B        | POS5             | <i>P<sub>GPD</sub>-POS5-T<sub>CYC1</sub>-URA1</i>                                                      |                                                                                                                                                                                                                                                                                                                                                                                                                                                                                                                                                                                                                                                                                                                                                                                                                                                                                                                                                                                                                                                                                                                                                                                                                                                                                                                                                                                                                                                                                                                                              |
| CSY1152 | pCS3649                        | 2B        | IDP1             | <i>P<sub>GPD</sub>-IDP1-T<sub>CYC1</sub>-URA1</i>                                                      |                                                                                                                                                                                                                                                                                                                                                                                                                                                                                                                                                                                                                                                                                                                                                                                                                                                                                                                                                                                                                                                                                                                                                                                                                                                                                                                                                                                                                                                                                                                                              |
| CSY1152 | pCS3652                        | 2B        | IDP2             | <i>P<sub>GPD</sub>-IDP2-T<sub>CYC1</sub>-URA1</i>                                                      |                                                                                                                                                                                                                                                                                                                                                                                                                                                                                                                                                                                                                                                                                                                                                                                                                                                                                                                                                                                                                                                                                                                                                                                                                                                                                                                                                                                                                                                                                                                                              |
| CSY1152 | pCS3646                        | 2B        | IDP3             | <i>P<sub>GPD</sub>-IDP3-T<sub>CYC1</sub>-URA1</i>                                                      |                                                                                                                                                                                                                                                                                                                                                                                                                                                                                                                                                                                                                                                                                                                                                                                                                                                                                                                                                                                                                                                                                                                                                                                                                                                                                                                                                                                                                                                                                                                                              |
| CSY1152 | pCS3657                        | 2B        | PDC6             | <i>P<sub>GPD</sub>-PDC6-T<sub>CYC1</sub>-URA1</i>                                                      |                                                                                                                                                                                                                                                                                                                                                                                                                                                                                                                                                                                                                                                                                                                                                                                                                                                                                                                                                                                                                                                                                                                                                                                                                                                                                                                                                                                                                                                                                                                                              |
| CSY1152 | pCS3647                        | 2B        | ALD4             | <i>P<sub>GPD</sub>-ALD4-T<sub>CYC1</sub>-URA1</i>                                                      |                                                                                                                                                                                                                                                                                                                                                                                                                                                                                                                                                                                                                                                                                                                                                                                                                                                                                                                                                                                                                                                                                                                                                                                                                                                                                                                                                                                                                                                                                                                                              |
| CSY1152 | pCS3653                        | 2B        | ALD6             | <i>P<sub>GPD</sub>-ALD6-T<sub>CYC1</sub>-URA1</i>                                                      |                                                                                                                                                                                                                                                                                                                                                                                                                                                                                                                                                                                                                                                                                                                                                                                                                                                                                                                                                                                                                                                                                                                                                                                                                                                                                                                                                                                                                                                                                                                                              |
| CSY1152 | pAG415GPD-ccdB, pAG416GPD-ccdB | S3C       | Control          | <i>P<sub>GPD</sub>-ccdB-T<sub>CYC1</sub>-LEU2</i><br><i>P<sub>GPD</sub>-ccdB-T<sub>CYC1</sub>-URA1</i> |                                                                                                                                                                                                                                                                                                                                                                                                                                                                                                                                                                                                                                                                                                                                                                                                                                                                                                                                                                                                                                                                                                                                                                                                                                                                                                                                                                                                                                                                                                                                              |
| CSY1152 | pAG415GPD-ccdB, pCS3653        | S3C       | ALD6_U           | <i>P<sub>GPD</sub>-ccdB-T<sub>CYC1</sub>-LEU2</i><br><i>P<sub>GPD</sub>-ALD6-T<sub>CYC1</sub>-URA1</i> |                                                                                                                                                                                                                                                                                                                                                                                                                                                                                                                                                                                                                                                                                                                                                                                                                                                                                                                                                                                                                                                                                                                                                                                                                                                                                                                                                                                                                                                                                                                                              |
| CSY1152 | pCS4104, pAG416GPD-ccdB        | S3C       | ALD6_L           | <i>P<sub>GPD</sub>-ALD6-T<sub>CYC1</sub>-LEU2</i><br><i>P<sub>GPD</sub>-ccdB-T<sub>CYC1</sub>-URA1</i> |                                                                                                                                                                                                                                                                                                                                                                                                                                                                                                                                                                                                                                                                                                                                                                                                                                                                                                                                                                                                                                                                                                                                                                                                                                                                                                                                                                                                                                                                                                                                              |
| CSY1152 | pAG415GPD-ccdB, pCS3655        | S3C       | TYR1_U           | <i>P<sub>GPD</sub>-ccdB-T<sub>CYC1</sub>-LEU2</i><br><i>P<sub>GPD</sub>-TYR1-T<sub>CYC1</sub>-URA1</i> |                                                                                                                                                                                                                                                                                                                                                                                                                                                                                                                                                                                                                                                                                                                                                                                                                                                                                                                                                                                                                                                                                                                                                                                                                                                                                                                                                                                                                                                                                                                                              |
| CSY1152 | pCS4104, pCS3655               | S3C       | ALD6_L<br>TYR1_U | <i>P<sub>GPD</sub>-ALD6-T<sub>CYC1</sub>-LEU2</i><br><i>P<sub>GPD</sub>-TYR1-T<sub>CYC1</sub>-URA1</i> |                                                                                                                                                                                                                                                                                                                                                                                                                                                                                                                                                                                                                                                                                                                                                                                                                                                                                                                                                                                                                                                                                                                                                                                                                                                                                                                                                                                                                                                                                                                                              |
| CSY1152 | pCS3655                        | 2B        | TYR1             | <i>P<sub>GPD</sub>-TYR1-T<sub>CYC1</sub>-URA1</i>                                                      |                                                                                                                                                                                                                                                                                                                                                                                                                                                                                                                                                                                                                                                                                                                                                                                                                                                                                                                                                                                                                                                                                                                                                                                                                                                                                                                                                                                                                                                                                                                                              |

**Table S1. Cont.**

| Strain  | Plasmid no.    | Fig.                              | x-axis label | Plasmid-based constructs                          | Genome modifications                                                                                                                                                                                                                                                                                                                                                                                                                                                                                                                                                                                                                                                                                                                                                                                                                                                                                                                                                                                                                                                                                                                                                                                                                                                                                                                                                                                                                                                                                                                                                                                                                                                            |
|---------|----------------|-----------------------------------|--------------|---------------------------------------------------|---------------------------------------------------------------------------------------------------------------------------------------------------------------------------------------------------------------------------------------------------------------------------------------------------------------------------------------------------------------------------------------------------------------------------------------------------------------------------------------------------------------------------------------------------------------------------------------------------------------------------------------------------------------------------------------------------------------------------------------------------------------------------------------------------------------------------------------------------------------------------------------------------------------------------------------------------------------------------------------------------------------------------------------------------------------------------------------------------------------------------------------------------------------------------------------------------------------------------------------------------------------------------------------------------------------------------------------------------------------------------------------------------------------------------------------------------------------------------------------------------------------------------------------------------------------------------------------------------------------------------------------------------------------------------------|
| CSY1153 |                | 2A, 3, 4B, 5, and 6 and S4 and S5 |              |                                                   | <i>ybr197cΔ::P<sub>TPH1</sub>-yRnSpr-T<sub>STE2</sub>, P<sub>TEF1</sub>-yRnPts-T<sub>CYC1</sub>, P<sub>GPD</sub>-yRnQdpr-T<sub>ADH1</sub>, P<sub>PGK1</sub>-yRnPcbd1-T<sub>PHOS</sub>; ydr514cΔ::P<sub>PYK1</sub>-PsCNMT-T<sub>MFA1</sub>, P<sub>PGK1</sub>-Ps6OMT-T<sub>PHOS</sub>, P<sub>TDH3</sub>-yEcNMCH-T<sub>ADH1</sub>, P<sub>TEF1</sub>-yPsCPR-T<sub>CYC1</sub>, P<sub>TPH1</sub>-yPs4' OMT-T<sub>STE2</sub>; ymr206wΔ::P<sub>GPD</sub>-yRnRntyrh<sup>WR</sup>-T<sub>ADH1</sub>, P<sub>TPH1</sub>-yPpddc-T<sub>STE2</sub>, P<sub>TEF1</sub>-yRnDhfr-T<sub>CYC1</sub>, P<sub>PGK1</sub>-truncated-yCjNCS-T<sub>PHOS</sub>; ybl059wΔ::ARO4<sup>Q166K</sup>, ARO7<sup>T226I</sup>, P<sub>TEF1</sub>-ARO10-T<sub>CYC1</sub>, P<sub>TDH3</sub>-TKL1-T<sub>ADH1</sub>; ypl250cΔ::P<sub>GPD</sub>-yRnRntyrh<sup>WR</sup>-T<sub>ADH1</sub>, P<sub>TEF1</sub>-Ps4' OMT-T<sub>CYC1</sub>, P<sub>PGK1</sub>-truncated-yCjNCS-T<sub>PHOS</sub>; trp1Δ::P<sub>HXT7</sub>-CYP82Y1A-T<sub>PGK1</sub>, P<sub>TEF1</sub>-PsS9OMT-T<sub>CYC1</sub>, P<sub>PGK1</sub>-PsBBE-T<sub>PHOS</sub>, P<sub>GPD</sub>-CJCAS-T<sub>ADH1</sub>; HIS3Δ::P<sub>GPD</sub>-PsTNMT-T<sub>CYC1</sub>, P<sub>PGK1</sub>-PsMT2-T<sub>PHOS</sub>, P<sub>ADH1</sub>-CYP82X1-T<sub>GAP1</sub>, P<sub>PYK1</sub>-PsCXE1-T<sub>MFA1</sub>; leu2Δ::P<sub>HXT7</sub>-CYP82X2-T<sub>CYC1</sub>, P<sub>GPD</sub>-PsAT1-T<sub>ADH1</sub>, P<sub>TPH1</sub>-PsSDR1-T<sub>STE2</sub>, P<sub>PGK1</sub>-PsMT3-T<sub>PHOS</sub>; ura1Δ::P<sub>TEF1</sub>-TYR1-T<sub>CYC1</sub>, P<sub>PYK1</sub>-CYP82X2-T<sub>PYK1</sub>, TmTRP, P<sub>GPD</sub>-PsS9OMT-T<sub>ADH1</sub>, P<sub>PYK1</sub>-ALD6-T<sub>MFA1</sub></i>    |
| CSY1203 |                | S3B                               |              |                                                   | <i>ybr197cΔ::P<sub>TPH1</sub>-yRnSpr-T<sub>STE2</sub>, P<sub>TEF1</sub>-yRnPts-T<sub>CYC1</sub>, P<sub>GPD</sub>-yRnQdpr-T<sub>ADH1</sub>, P<sub>PGK1</sub>-yRnPcbd1-T<sub>PHOS</sub>; ydr514cΔ::P<sub>PYK1</sub>-PsCNMT-T<sub>MFA1</sub>, P<sub>PGK1</sub>-Ps6OMT-T<sub>PHOS</sub>, P<sub>TDH3</sub>-yEcNMCH-T<sub>ADH1</sub>, P<sub>TEF1</sub>-yPsCPR-T<sub>CYC1</sub>, P<sub>TPH1</sub>-yPs4' OMT-T<sub>STE2</sub>; ymr206wΔ::P<sub>GPD</sub>-RnRntyrh<sup>WR</sup>-T<sub>ADH1</sub>, P<sub>TPH1</sub>-yPpddc-T<sub>STE2</sub>, P<sub>TEF1</sub>-yRnDhfr-T<sub>CYC1</sub>, P<sub>PGK1</sub>-truncated-yCjNCS-T<sub>PHOS</sub>; ybl059wΔ::ARO4<sup>Q166K</sup>, ARO7<sup>T226I</sup>, P<sub>TEF1</sub>-ARO10-T<sub>CYC1</sub>, P<sub>TDH3</sub>-TKL1-T<sub>ADH1</sub>; ypl250cΔ::P<sub>GPD</sub>-RnRntyrh<sup>WR</sup>-T<sub>ADH1</sub>, P<sub>TEF1</sub>-Ps4' OMT-T<sub>CYC1</sub>, P<sub>PGK1</sub>-truncated-yCjNCS-T<sub>PHOS</sub>; trp1Δ::P<sub>HXT7</sub>-CYP82Y1A-T<sub>PGK1</sub>, P<sub>TEF1</sub>-PsS9OMT-T<sub>CYC1</sub>, P<sub>PGK1</sub>-PsBBE-T<sub>PHOS</sub>, P<sub>GPD</sub>-CJCAS-T<sub>ADH1</sub>; HIS3Δ::P<sub>GPD</sub>-PsTNMT-T<sub>CYC1</sub>, P<sub>PGK1</sub>-PsMT2-T<sub>PHOS</sub>, P<sub>ADH1</sub>-CYP82X1-T<sub>GAP1</sub>, P<sub>PYK1</sub>-PsCXE1-T<sub>MFA1</sub>; leu2Δ::P<sub>HXT7</sub>-CYP82X2-T<sub>CYC1</sub>, P<sub>GPD</sub>-PsAT1-T<sub>ADH1</sub>, P<sub>TPH1</sub>-PsSDR1-T<sub>STE2</sub>, P<sub>PGK1</sub>-PsMT3-T<sub>PHOS</sub>; ura1Δ::P<sub>PGK1</sub>-truncated-yCjNCS-T<sub>PHOS</sub>, P<sub>HXT7</sub>-CYP82X2-T<sub>CYC1</sub>, P<sub>GPD</sub>-PsS9OMT-T<sub>ADH1</sub>, P<sub>PYK1</sub>-Ald6-T<sub>MFA1</sub></i> |
| CSY1203 | pAG416GPD-ccdB | S3B                               | control      | <i>P<sub>GPD</sub>-ccdB-T<sub>CYC1</sub>-URA1</i> |                                                                                                                                                                                                                                                                                                                                                                                                                                                                                                                                                                                                                                                                                                                                                                                                                                                                                                                                                                                                                                                                                                                                                                                                                                                                                                                                                                                                                                                                                                                                                                                                                                                                                 |
| CSY1203 | pCS3645        | S3B                               | POS5         | <i>P<sub>GPD</sub>-POS5-T<sub>CYC1</sub>-URA1</i> |                                                                                                                                                                                                                                                                                                                                                                                                                                                                                                                                                                                                                                                                                                                                                                                                                                                                                                                                                                                                                                                                                                                                                                                                                                                                                                                                                                                                                                                                                                                                                                                                                                                                                 |
| CSY1203 | pCS3649        | S3B                               | IDP1         | <i>P<sub>GPD</sub>-IDP1-T<sub>CYC1</sub>-URA1</i> |                                                                                                                                                                                                                                                                                                                                                                                                                                                                                                                                                                                                                                                                                                                                                                                                                                                                                                                                                                                                                                                                                                                                                                                                                                                                                                                                                                                                                                                                                                                                                                                                                                                                                 |
| CSY1203 | pCS3652        | S3B                               | IDP2         | <i>P<sub>GPD</sub>-IDP2-T<sub>CYC1</sub>-URA1</i> |                                                                                                                                                                                                                                                                                                                                                                                                                                                                                                                                                                                                                                                                                                                                                                                                                                                                                                                                                                                                                                                                                                                                                                                                                                                                                                                                                                                                                                                                                                                                                                                                                                                                                 |
| CSY1203 | pCS3646        | S3B                               | IDP3         | <i>P<sub>GPD</sub>-IDP3-T<sub>CYC1</sub>-URA1</i> |                                                                                                                                                                                                                                                                                                                                                                                                                                                                                                                                                                                                                                                                                                                                                                                                                                                                                                                                                                                                                                                                                                                                                                                                                                                                                                                                                                                                                                                                                                                                                                                                                                                                                 |
| CSY1203 | pCS3657        | S3B                               | PDC6         | <i>P<sub>GPD</sub>-PDC6-T<sub>CYC1</sub>-URA1</i> |                                                                                                                                                                                                                                                                                                                                                                                                                                                                                                                                                                                                                                                                                                                                                                                                                                                                                                                                                                                                                                                                                                                                                                                                                                                                                                                                                                                                                                                                                                                                                                                                                                                                                 |
| CSY1203 | pCS3647        | S3B                               | ALD4         | <i>P<sub>GPD</sub>-ALD4-T<sub>CYC1</sub>-URA1</i> |                                                                                                                                                                                                                                                                                                                                                                                                                                                                                                                                                                                                                                                                                                                                                                                                                                                                                                                                                                                                                                                                                                                                                                                                                                                                                                                                                                                                                                                                                                                                                                                                                                                                                 |
| CSY1203 | pCS3653        | S3B                               | ALD6         | <i>P<sub>GPD</sub>-ALD6-T<sub>CYC1</sub>-URA1</i> |                                                                                                                                                                                                                                                                                                                                                                                                                                                                                                                                                                                                                                                                                                                                                                                                                                                                                                                                                                                                                                                                                                                                                                                                                                                                                                                                                                                                                                                                                                                                                                                                                                                                                 |
| CSY1203 | pCS3655        | S3B                               | TYR1         | <i>P<sub>GPD</sub>-TYR1-T<sub>CYC1</sub>-URA1</i> |                                                                                                                                                                                                                                                                                                                                                                                                                                                                                                                                                                                                                                                                                                                                                                                                                                                                                                                                                                                                                                                                                                                                                                                                                                                                                                                                                                                                                                                                                                                                                                                                                                                                                 |

Base strain is CEN.PK2-1D (*MATα*; *ura3-52*; *trp1-289*; *leu2-3,112*; *his3Δ1*; *MAL2-8<sup>c</sup>*; *SUC2*), and constructs are expressed from low-copy plasmids. P, promoter; T, terminator.



**Table S2. Plasmids used in this study**

| Plasmid no.    | Genotype                                                                                                         | Refs.     |
|----------------|------------------------------------------------------------------------------------------------------------------|-----------|
| pAG416GPD-ccdB | Centromeric <i>URA3</i> , <i>attR1-PGPD-ccdB-attR2</i>                                                           | 37        |
| pCS3636        | <i>attL1-POSS5-attL1</i>                                                                                         | This work |
| pCS3642        | <i>attL1-IDP1-attL1</i>                                                                                          | This work |
| pCS3643        | <i>attL1-IDP2-attL1</i>                                                                                          | This work |
| pCS3637        | <i>attL1-IDP3-attL1</i>                                                                                          | This work |
| pCS3663        | <i>attL1-PDC6-attL1</i>                                                                                          | This work |
| pCS3640        | <i>attL1-ALD4-attL1</i>                                                                                          | This work |
| pCS3639        | <i>attL1-ALD6-attL1</i>                                                                                          | This work |
| pCS3644        | <i>attL1-TYR1-attL1</i>                                                                                          | This work |
| pCS3125        | <i>attL1-P<sub>TEF1</sub>-CYP82Y1A-T<sub>CYC1</sub>-attL2</i>                                                    | 14        |
| pCS3131        | <i>attL1-P<sub>PYK1</sub>-CYP82Y1A-T<sub>MFA1</sub>-attL2</i>                                                    | 14        |
| pCS3146        | <i>P<sub>HXT7</sub>-CYP82Y1A-T<sub>CYC1</sub>, leu2</i> , template for integration cassette                      | 14        |
| pCS3064        | <i>attL1-P<sub>TEF1</sub>-PsS9OMT-T<sub>CYC1</sub>-attL2</i>                                                     | 14        |
| pCS3060        | <i>attL1-P<sub>PGK1</sub>-PsBBE-T<sub>PHO5</sub>-attL2</i>                                                       | 16        |
| pCS3075        | <i>attL1-P<sub>GPD</sub>-CjCAS-T<sub>ADH1</sub>-attL2</i>                                                        | 16        |
| pCS3145        | <i>P<sub>GPD</sub>-PsTNMT-T<sub>CYC1</sub>, KanMX</i> , template for integration cassette                        | 14        |
| pCS3143        | <i>attL1-P<sub>PGK1</sub>-PsMT2-T<sub>PHO5</sub>-attL2</i>                                                       | 14        |
| pCS2922        | <i>hphNT1</i> selection marker ( <i>HygR</i> ) flanked by <i>loxP</i>                                            | 38        |
| pCS3134        | <i>attL1-P<sub>ADH1</sub>-CYP82X1-T<sub>GAP1</sub>-attL2</i>                                                     | 14        |
| pCS3141        | <i>attL1-P<sub>PYK1</sub>-PsCXE1-T<sub>MFA1</sub>-attL2</i>                                                      | 14        |
| pCS3147        | <i>P<sub>HXT7</sub>-CYP82X2-T<sub>CYC1</sub>, KanMX</i> , template for integration cassette                      | 14        |
| pCS3140        | <i>attL1-P<sub>GPD</sub>-PsAT1-T<sub>ADH1</sub>-attL2</i>                                                        | 14        |
| pCS3142        | <i>attL1-P<sub>TPH1</sub>-PsSDR1-T<sub>STE2</sub>-attL2</i>                                                      | 14        |
| pCS3244        | <i>attL1-P<sub>PGK1</sub>-PsMT3-T<sub>PHO5</sub>-attL2</i>                                                       | 14        |
| pCS3659        | <i>attL1-P<sub>TEF1</sub>-TYR1-T<sub>CYC1</sub>-attL2</i>                                                        | This work |
| pCS3136        | <i>attL1-P<sub>CYC1</sub>-CYP82X2-T<sub>PYK1</sub>-attL2</i>                                                     | 14        |
| pCS2923        | <i>TmtrpF</i> selection marker ( <i>TYR</i> ) flanked by <i>loxP</i>                                             | 38        |
| pCS3661        | <i>attL1-P<sub>PYK1</sub>-ALD6-T<sub>MFA1</sub>-attL2</i>                                                        | This work |
| pCS3638        | CRISPR Construct for removal of N terminus of <i>CjNCS</i>                                                       | This work |
| pCS3658        | CRISPR Construct for replacement of codon-optimized <i>Rntyrrh<sup>WR</sup></i> ( <i>yRntyrrh<sup>WR</sup></i> ) | This work |

P, promoter; T, terminator.

**Table S3. DNA sequences of genes used in this study**

| Gene               | Codon-optimized<br>or GenBank accession no. | DNA sequence                                                                                                                                                                                                                                                                                                                                                                                                                                                                                                                                                                                                                                                                                                                                                                                                                                                                                                                                                                                                                                                                                                                                                                                                                                                                                                                                                                                                                                                                                                                                                                                                                                                                                                                                                                                                                                                |
|--------------------|---------------------------------------------|-------------------------------------------------------------------------------------------------------------------------------------------------------------------------------------------------------------------------------------------------------------------------------------------------------------------------------------------------------------------------------------------------------------------------------------------------------------------------------------------------------------------------------------------------------------------------------------------------------------------------------------------------------------------------------------------------------------------------------------------------------------------------------------------------------------------------------------------------------------------------------------------------------------------------------------------------------------------------------------------------------------------------------------------------------------------------------------------------------------------------------------------------------------------------------------------------------------------------------------------------------------------------------------------------------------------------------------------------------------------------------------------------------------------------------------------------------------------------------------------------------------------------------------------------------------------------------------------------------------------------------------------------------------------------------------------------------------------------------------------------------------------------------------------------------------------------------------------------------------|
| PsTNMT<br>CYP82Y1A | DQ028579.1<br>Codon-optimized               | <p>ATGAGAACCGAATCCATCAAGACCAACAGACCAATGGATTGTGTGTTGCAATACTTAC-<br/>AACCTATCTCCGTTGCCTTGGTTGTTATTGCTTTGGTTTGGAAATTACGGTAGAAGAAA-<br/>CCCAACTAAGAAATTGGCTCCTGAAGCTAGTGGTGTCTGGCCAGTTATTGGTCATTTG-<br/>TTGTTGTTTATGAACGAAAACGACTTGAACCAGGTTACTTTGGGTGCATGGGTGATA-<br/>AGTATGGTCCAATTTTCATGAGATTTCGGTAGACATAGAACCCTGGTTGTTCTTC-<br/>ATGGGAAATGGTCAAAGAATGTTTACCAGGTACAACGACAAGTTGTTTTCTAACAGA-<br/>CCATCTTCTTGGCCGTTAAGTTGATGTTTTACGACACTGAATCTTACGGTTTTGCCCC-<br/>CATACGGTAAATATTGGAGAGAATTGAGAAAGATCTCCACCATAAGTTGTTGTCCAA-<br/>TCAACAATTGGAAAAGTTCAAGCACTTGAGAATCTCCGAAGTTGACAACCTCTTCAA-<br/>AAGTTGCATGAATTGTGCTCCAACAACAAGCAAGGTGGTGATACAACCTACGTTGCTT-<br/>CTTTGGTTAGAAATGGATGATTGGTTTGCCTACTTGACCTTCAACGTTATTGGTAGAAT-<br/>CGTCAGTGGTTTCCAATCTAATGCTGTGCTGGTGTACTAATCCCAAGAAAAGTAC-<br/>AAGTTGGCCATCGATGAAGTCTCTAATTTGATGGTACTTTCCGCGTTTCTGATGTTG-<br/>TTCCAAGATTGGGTTGGATTGATAGATTGACTGGTTTGACCGGTAAGATGAAGAAC-<br/>GTGGTAAAAAGTTGGATGCCGTTGTTGGTGATGCTGTTGAAGATCATAGACAAAAGA-<br/>AATTGAAGATCTCTAGAACAACACCGGTGCTTTGACTGAACATGAAGAAGAAGATTT-<br/>CATCGACGCTGCTTGTCCATTATGGAAACAATCTCAAATCCAGGTAACCACCCAGAA-<br/>ATCTCCGTTAAGTCTATTGCTTTGGATATGTTGCTGGTGGTTCTGATACCACCAAGT-<br/>TGATTGACTTGGACCTTGTCTTTGTTATTGAACCACCTGATATTTGGACAAGGC-<br/>CAAAGAAGAAGTTGATACCTACTTTGGTAAGAAAAGATCTGTGATAACACCCCGATT-<br/>GTTGATGCTGCTGATGTTCTAATTTGGTTTACATTCAGCCATCATCAAAGAATCCA-<br/>TGAGATTATACCCAGCCTCTACCTTGATGGAAAGAATGACTTCTGATGATTGTGATGT-<br/>CGGTGGTTTTTCATGTTCCAGCTGGTACTAGATTGTGGGTTAATGTTTGGAAAGATGCAA-<br/>AGAGATCCAAGAGTTTGGAAAGACCCATTGGTTTTTTTTGCCAGAAAGATCTTGTCCA-<br/>ACGATAAGGGTATGGTTGATGTTAAGGGTCAAAACTACGAATGATCCCATTTGGTAC-<br/>TGGTAGAAGAATTTGGCAGGTGCTTCTTTGCTTTAGAAGTCTTGCATTGGTCTTG-<br/>ACCAGATTGATCTTGGAAATTCGAAATGAAGGCTCCTGAAGGTAAGATTGATATGAGA-<br/>GCTAGACCAGGTTTCTCCACAACAAGTTGTTCCATTGGATGTTCAATTGACCCCAA-<br/>GAACTTTGGACTAA</p> |
| PsS9OMT            | Codon-optimized                             | <p>ATGGCTACTAATGGTGAAATTTTCAACACCTACGGTCACAACCATCAATCTGCTACTG-<br/>TTACTAAGATTACCGCCTCTAACGAATCTTCTAACGGTGTGTTGTTACTTGTCTGAAAC-<br/>TGCCAACTTGGGTAAATTGATCTGTATTCCAATGGCTTTGAGAGCTGCTATGGAATTG-<br/>AATGTTTTCCAATTGATCTCCAAGTTCGGTACTGATGCTAAAAGTTTCCGCTTCTGAAA-<br/>TTGCTTCTAAGATGCCAAATGCTAAGAACAATCCTGAAGCTGCAATGTACTTGGACAG-<br/>AATCTTGAGATTATTTGGTGCCTCCTCTATCTTGTCTGTTTCTACTACTAAGAAATCC-<br/>ATCAACAGAGGTGGTGTGATGTTGTTGTACACGAAAAGTTGTACGGTTTGACCAAC-<br/>TCTTCTTGTGTTTGGTTCCAAGACAAGAAGATGGTGTTCCTTGGTTGAAGAATTGT-<br/>TGTTCACTCCGATAAGGTTGTTGTTGACTCCTTCTTCAAATGAAATGCGTCGTTGA-<br/>AGAAAAGGACTCCGTCCATTGAAAGTTGCTCATGGTGTAAAGATTTTGAATACGCT-<br/>GCTACTGAACCTAGAATGAATCAAGTTTTCAACGATGGTATGGCCGTTTTCTCTATCG-<br/>TTGTTTTGAAGCCGTTTTTCAAGTTTACGATGGTTTCTTGGACATGAAGGAATTATT-<br/>GGATGTTGGTGGTATCGGTACTTCCGTTTCTAAAATCGTTGCTAAGTACCATTG-<br/>ATCAGAGGTGTTAATTTTCGATTTGCCACACGTTATTTCTGTTGCTCCACAATATCCTG-<br/>GTGTTGAACATGTTGCTGGTGATATGTTGGAAGAAGTTCCAAAAGGTCAAAACATGTT-<br/>GTTGAAGTGGGTTTTTACATGATTGGGGTGACGAAAAGATGTGTCGAAGTTGTTGAAAA-<br/>CTGCTGGAACCTTTTCCAGTTGGTGGTAAGGTTTTGATCATCGAATTTGCTTGGCA-<br/>AACGAATTGGGTAACAACGCTGAATCTTTCAACGCTTTGATTCAGATTTGTTGTTAA-<br/>TGCCCTTGAACCCAGGTGGTAAAGAAAGACTATTTCCGAATACGACGATTTGGGTA-<br/>AAGCTGCTGGTTTCATTAAGACCATTCCAATCCCAATCTCCAACGGTTTACATGTTAT-<br/>CGAATTCATAAGTAA</p>                                                                                                                                                                                                                                                                                                                                                                                                                                                                                                                    |
| PsBBE              | AF025430.1                                  |                                                                                                                                                                                                                                                                                                                                                                                                                                                                                                                                                                                                                                                                                                                                                                                                                                                                                                                                                                                                                                                                                                                                                                                                                                                                                                                                                                                                                                                                                                                                                                                                                                                                                                                                                                                                                                                             |

Table S3. Cont.

| Gene  | Codon-optimized<br>or GenBank accession no. | DNA sequence                                                                                                                                                                                                                                                                                                                                                                                                                                                                                                                                                                                                                                                                                                                                                                                                                                                                                                                                                                                                                                                                                                                                                                                                                                                                                                                                                                                                                                                                                                                                                                                                                                                                                                                                                                                                                                                                                                                                                                                                                                                                                                                                                                                                                       |
|-------|---------------------------------------------|------------------------------------------------------------------------------------------------------------------------------------------------------------------------------------------------------------------------------------------------------------------------------------------------------------------------------------------------------------------------------------------------------------------------------------------------------------------------------------------------------------------------------------------------------------------------------------------------------------------------------------------------------------------------------------------------------------------------------------------------------------------------------------------------------------------------------------------------------------------------------------------------------------------------------------------------------------------------------------------------------------------------------------------------------------------------------------------------------------------------------------------------------------------------------------------------------------------------------------------------------------------------------------------------------------------------------------------------------------------------------------------------------------------------------------------------------------------------------------------------------------------------------------------------------------------------------------------------------------------------------------------------------------------------------------------------------------------------------------------------------------------------------------------------------------------------------------------------------------------------------------------------------------------------------------------------------------------------------------------------------------------------------------------------------------------------------------------------------------------------------------------------------------------------------------------------------------------------------------|
| CjCAS | Codon-optimized                             | <p>ATGGAAATGAACCCCTTTGTTGGTTTTGTGCTACTGTTGCTATCGTTTTTCGCTACTACCA-<br/>                     CCATTATCAGAATCTTGTTCCTCTTCTTCCCTGCCACAAATGAAGTGGCCATCTGG-<br/>                     TCCAAGAAAATTGCCAATTATTGGTAACCTGCACCAATTAGGTGATGATGCTTGCAT-<br/>                     GTTGCTTTGGCTAAATTGGCAAAAGTTCACGGTCTCTGTTATGACCATTTGGATTGGTT-<br/>                     CTGGAGACCAGTTATCGTTATCTCCGATATTGAAAAGGCTTGGGAAGTTTTGGTTAA-<br/>                     CAAGTCTGCTGATTATGGTGTAGAGATATGCCAGAATTACCAAGATTGCTTCTGCT-<br/>                     TCTTGGCATACCATTCTACATCTGATGCTGGTCTTCTTGGCAAAATGTAGAAAAGG-<br/>                     GTTTACAATCTGGTGTATGGTCCATTGAATGTTGCTGCTCAAAATCAATACCAAGA-<br/>                     AAGAGACATGAAGAGATGATCAAGGCCATGCTGATGAAGCTGCTAACAACAATGG-<br/>                     TATCGTTAAGCCATTGGATCACATCAAGAAGAACACCGTTAGATTATTGACCAGATTG-<br/>                     ATTTTCGGTCAAGCCTTCGATGATAACAAGTTCATCGAATCCATGCATACGAAATCG-<br/>                     AAGATATCATCAGAATTTCCGGTTACGCTAGATTGGCTGAAGCCTTTTATTACGCTAA-<br/>                     TACTTGCCATCCCATAGAAGGCTGAAAGAGAAGCCTTCTGGTTAAGTGTAGAGTT-<br/>                     GAAGAATTGGTCAGACCTTTGTTGTCATCTAAGCCACCAACTAATCTTACTTGTACT-<br/>                     TCTTGTGTCCAAAACCTTTGAAGAAGAAGTTATCATCTTCTGCATCTTTGAATTATAC-<br/>                     TTGTTGGGTGTGACTCCACTTCTTCTACTACTACATGGGCTTTGGCTTACTTGATTA-<br/>                     GAGAACAAGGTGCTCAAGAAAAGTTGTACCAAGATATCAGAATGACCTTGGGTGATG-<br/>                     TTGATTTGGTCAAGATCGAAGATGTCAACAAGTTGAAGTACTGCAAGGTGTTGTCAA-<br/>                     AGAAACCATGAGAATGAAGCCTATTGCTCCATTGGCTATTCCACATAAGACTGCTAAA-<br/>                     GAAACTACCTTGATGGGTACTAAGGTTGCTAAGGGTACTAGAATCATGGTTAACTTGT-<br/>                     ACGCCTTGCACCACAATCAAAACATTTGGCCAGATCCATACAAATTCATGCCTGAAAG-<br/>                     ATTCTTGGAAAGGTGAAACTGGTACTGCTTACAACAAAGCTATGGAACAATCTTCTTG-<br/>                     CCATTCTCTGCTGGTATGAGAATTTGTGCAGGTATGGATTTGGGTAAATTACAATTCG-<br/>                     CTTTTGCCTTGGCCAACCTGGTTAATGCTTTTAAAGTGGTCTTGTGTTGAAGAAGGTAA-<br/>                     ATTGCCAGATATGGGTGAAGAATTTATCCTTCGCTTGTGTTGATGAAGACTCCATTGGAA-<br/>                     GCTAGAATTGCTGGTAGAAAACGTTTAA</p> |
| PsAT1 | Codon-optimized                             | <p>ATGGCTACCATGTCATCTGCTGCCGTTGAAGTTATTTCTAAAGAAACCATCAAGCCAA-<br/>                     GAAACCAACTCCATATCAATTGAGAACTACAACATGCTCCTTGTGGACCAATCTC-<br/>                     CTCTTGGTTTACGTTCCAATCATCTTGTTTTACCAGCTGCTTCTGATGCTAATTCCA-<br/>                     CTGGTTCTAAACATCATGATGACTTGCACCTGTTGAAGAGATCCTTGTCTGAAACTTT-<br/>                     GGTTCACTTTTATCCAATGGCCGGTAGAATGAAGGATAACATGACTGTTGATTGCAAC-<br/>                     GATGAAGGTATCGACTTCTTTGAAGTTAGAATCAAGGGTAGAATGTGCGACTTCATG-<br/>                     ATGAAGAGTGATGCTCATTTGTCTTTGTTGTTGCCATCTGAAGTTGCTTCTACCAACT-<br/>                     TTGTCAAAGAAGCCCAAGTTATCGTTCAAGTCAACATGTTGATTGTTGGTGGTACTGC-<br/>                     TATTTGCTTCTGCATTTCTAACAAGATTGCTGATGCTGCACCATGATTACCTTCATTA-<br/>                     GATCTTTGGCTGGTACTACCAACATTGCTAGAAAGAGTTCTTCTATTGCTGCTCCAAC-<br/>                     TACCAATCAAAATTTGGTTCCTTCTTTCGACTCCACCTCTTGTTCACCATCTGAAAC-<br/>                     AATTGGCTTCCCAAGTTCTTATCCAACCTCAAGATTCTACCTCCGTTGACAAGTTGGT-<br/>                     TTCTAAGAGATTTGTTTTCGATGCCGCCAAGATTACTTCTGCTAGAGAAAAATGCAA-<br/>                     TCCTTGATGCACGATAAGTACAAGTGTATAGACCAACCAGAGTTGAAGTTGTTTCTG-<br/>                     CTTTGATTTGGAAGTCCGCTGTTAAGTCTGCTCCACCAGTTCTATTTCTACTGTTAC-<br/>                     TCATGCTATGAACCTCAGAAAAGAAGATGGATCCACCATTGCAAGATGCTTCATTTGGT-<br/>                     AACTTGTGTGTTGTTGTTACTGCTGTTTTGCCAGCTACTACTGCTACTACAACATAATC-<br/>                     CAGCTACTAAGAAGGTTTCTTACTCTTAATGAAGAACAAGTTGCTTGGATGAATT-<br/>                     GTCCGATTTTGTGCTTTGTTGAGAAGAGAAATCGACAAGGTTAAGGGTGATAAGGG-<br/>                     TTGCATGGAAGATCATCCAAAAGTTCATCTACGGTCATGATGCCTCTGTTGCTAAA-<br/>                     GATTCGATGTTGAAGATAAGGTTACCGCCTGTTTATGACTTCTGGTGAAGTTG-<br/>                     GTTTCTACGAAGCTGATTTTGGTTGGGGTACTCCAGTTTGGGTTACTACTGTTCCATT-<br/>                     GATTGAACCTAAGTACAAGAACATGGTTTTTCATGAACGATATGAAGTGCAGGTAAGG-<br/>                     TATTGAAGTTTGGGTTAACTTCTTGAAGATGACATGACCAAGTTTGAACACCACCTG-<br/>                     AGAGAAATCTTGCAATTATTCTAA</p>                                                                                                |

Table S3. Cont.

| Gene    | Codon-optimized<br>or GenBank accession no. | DNA sequence                                                                                                                                                                                                                                                                                                                                                                                                                                                                                                                                                                                                                                                                                                                                                                                                                                                                                                                                                                                                                                                                                                                                                                                                                                                                                                                                                                                                                                                                                                                                                                                                                                                                                                                                                                                                                                      |
|---------|---------------------------------------------|---------------------------------------------------------------------------------------------------------------------------------------------------------------------------------------------------------------------------------------------------------------------------------------------------------------------------------------------------------------------------------------------------------------------------------------------------------------------------------------------------------------------------------------------------------------------------------------------------------------------------------------------------------------------------------------------------------------------------------------------------------------------------------------------------------------------------------------------------------------------------------------------------------------------------------------------------------------------------------------------------------------------------------------------------------------------------------------------------------------------------------------------------------------------------------------------------------------------------------------------------------------------------------------------------------------------------------------------------------------------------------------------------------------------------------------------------------------------------------------------------------------------------------------------------------------------------------------------------------------------------------------------------------------------------------------------------------------------------------------------------------------------------------------------------------------------------------------------------|
| CYP82X1 | Codon-optimized                             | <p>ATGGAATTATTTCATCAAGTTGCCATTTCACCAACCTATCCCATTCTCCATTATTTTGGT-<br/>TACCACCGTTTCCATCGTCTTGTTGTACTCTGTTTTTTCTGGGTTACCGACAAAAAG-<br/>AAGAAGAGAAAAAGGCTCCAAATGCTGCTGGTGGTGGCCATTGATTGGTCATTTG-<br/>AGATTATTGATGAACGACAAAGAACCATTATACAGAGCCTTGGGTTCTATGGCTGATA-<br/>AGTATGGTCCAGCTTTCAACATCAGATTGGGTAATCAAGAAGTCTTGGTTGTCTCTAA-<br/>TTGGGAAATGGTTAAGCAATGCTTCGGTAATCAAACGACAAGTTGTTCTCTAACAGA-<br/>CAAACACTTTGGCTGCCAAGTACATGTTGAATCAAACACTCTCTCTGGTTTTGCTC-<br/>CATACGGTCCATATTGGAGAGAATTGAGAAAAGATCATGGTTCAACAATATTGTCCAA-<br/>GCAATCCTTGGAACTTTGGAAGCACTTGAAGATCAAAGAAATGGATGCCTCCTTCTCC-<br/>AAATTGAACGAATTGTGTAACAACAACGGTACTGGTACTGCTACCTTGATTAGAATGG-<br/>ACGAATGGTTTGTGTAATTGACCTTCAACGTTATTGCCAGAAATGTTTTCGGTTACCA-<br/>ATCTGGTGGTAGATCAACTGCTTTGACTAATGGTGATACTGAATCCAAGGGTGAAG-<br/>ATACAAAAGACTTTGGAAGAGCCTTGCACTTGATGTCTATTTTCGCCGTTTCTGAT-<br/>ATCTTCCCATCTTTGGAATGGGTTGATAGATTGAGAGGTTTGTATCAGAAAATGAAGA-<br/>GATTCGGTGACGAATTGAACCTATTGCTGGTTGCTTGATCGAAGAACACAGACAAA-<br/>AGAGATTACAATCCGTCAGTAAGTCCGATAAGGGTGTGGTGATGAACAAGATTTCC-<br/>TTGACGTTTTGTTGCTCCGTTGCTGAAAAATCTCAATTGCCAGGTGATGATCCAGATTT-<br/>GGTTATCAAGTCCATGATTTTGGAAATCGTCAGTGGTGGTCTGAAACCCTTCTTCT-<br/>ACTTTGACTTGGGCTTTGTGTTGTTATTGAACCATCCACAGTTTGAAGAAGGCCA-<br/>AAGAAGAATTGGATACTACGTTGGTAAGGATAGACAGTTGAAGAATCTGATACTC-<br/>CAAAGTTGGTTTACATCAACGCCATCATCAAAGAATCCATGAGATTATACCCAAACGG-<br/>TGCCATGTTGGATAGATTGGCTTTAGAAGAATGGAAGTTGGTGGTTTTTCATGTTCCA-<br/>GCCGGTGGTAGATTATTTGTTAACGTTTGAAGATCCAAGAGATCCATCTGTTTGGG-<br/>AAAACCATTGGAATTCAAACCAGAAAGATGGTCTTGTCCAACGGTAAAAAATGG-<br/>ATGTTGATTACAAGGGTCAACACCAGAAATTCATTCCATTTGGTATTGTTAGAAGAAT-<br/>GTGGCTGGTATGTTGTTGGGCTTCTGAAGTTATTCATTTGGTCTTGCCAAGATTGATC-<br/>CACGGTTTTGATATGAAGGCTGCTTCAGCTAATGGTAAGGTTGATATGGCTGAAATG-<br/>GCTGGTATGGTTATCTGTTTCAAGAAAACCCCTTTGGAAGTTATGGTCAACCCAAGAG-<br/>AATGA</p> |
| PsCXE1  | Codon-optimized                             | <p>ATGGCCGATCCATACGAATCTTGTGATGTATTTCATAACCCAGAAGAAGATACCTTGA-<br/>CCAGAAATTTCCAATCCAGCTACTCCATTGGACCAAAACACTAAGGATATTTCTTT-<br/>GAACCCAGACAGAAAGACCTCCTTGAGAATTTTAGACCCTACAAAAGAACCACC-<br/>AGTCACTAAGAACAAGTTGTTGCCAATTATCATCTACTTCCATGGTGGTGGTTTCATT-<br/>TTGTTCAACGCTGATTCTACCATGAACCAGATTTCTGTCAATCTATTGCTACCCATA-<br/>TTCCAGCCTTGGTTGTTTCTGTTGATTATAGATTGGCTCCAGAAAACAGATTGCCAGC-<br/>TGCTTATGATGATGCTGTGATGCTTTGAATTGGGTTAAGGATCAAGGTTTGGGTA-<br/>TTGAACAACCTCGAAGTCTGGTTGAAAGAATACGGTGATTTCTCCAAGTGCTTTATCA-<br/>TGGGTTGTTCTCAGGTGCTAATGTTGCTTATCATGCTTCCTTGAGAGCCATCGAAAT-<br/>GGATTGGAACCAGCTAAAATCAACGGTTTGATCTTGCAATTGTCATTCTTCGGTTCT-<br/>TTGGAAGAAGTGAATCCGATTCCAAGGTCATCAACAATCAAGATTTGCCATTGGCCG-<br/>TTAGAGATGTTATGTGGAAATGGCTTTGCCATTAGGTTCTACTAGAGATCATGTTTA-<br/>CTGCAACCCAAACATCGATCATGATGGTTCTTCATCTGGTAAACATGGTTGGTTTGATT-<br/>GAAAGATGCTTCGTTGTTGGTTTTTACGGTGATCCATTGATCGACAGACAAAATCCAAT-<br/>TGGTCAAGATGTTGGAAGAAAAGGGTGTAAAGGTTGAAACCTGGATTGAACAAGGTG-<br/>GTTATCATGGTGTGTTGCTTCGATCCAATGATCAGAGAAAACCTTCTTGGAAAAGTT-<br/>GAAGCACTTCACTTGAACGACGAATTCATCTACTAA</p>                                                                                                                                                                                                                                                                                                                                                                                                                                                                                                                                                                                                                                                                                                                                                     |

**Table S3. Cont.**

| Gene   | Codon-optimized<br>or GenBank accession no. | DNA sequence                                                                                                                                                                                                                                                                                                                                                                                                                                                                                                                                                                                                                                                                                                                                                                                                                                                                                                                                                                                                                                                                                                                                                                                                                                                                                                                                                                                                                                                                                                                                                                                                     |
|--------|---------------------------------------------|------------------------------------------------------------------------------------------------------------------------------------------------------------------------------------------------------------------------------------------------------------------------------------------------------------------------------------------------------------------------------------------------------------------------------------------------------------------------------------------------------------------------------------------------------------------------------------------------------------------------------------------------------------------------------------------------------------------------------------------------------------------------------------------------------------------------------------------------------------------------------------------------------------------------------------------------------------------------------------------------------------------------------------------------------------------------------------------------------------------------------------------------------------------------------------------------------------------------------------------------------------------------------------------------------------------------------------------------------------------------------------------------------------------------------------------------------------------------------------------------------------------------------------------------------------------------------------------------------------------|
| PsSDR1 | Codon-optimized                             | <p>ATGCACGGTCAAAGAACATCTCCGAAAGATACCAAAGTTCAAAGAAATGGAAGGT-<br/>                     ACTGGTAAGATCGTTTGTGTTACTGGTGGTGCCTGTTATTTGGCTTCTTGGTTGATTA-<br/>                     TGAGATTATTGAAAGAGGTTACTCCGTTAGAACCCCGTTAGATCTGATCCAAAGTT-<br/>                     CAGAGAAGATGTCCTCATTGAAAGCTTGGCAGAAGCTACTGAAAAGTTGCAAATT-<br/>                     TTTGAAGCCGACTTGGAAAACCCAGAATCTTTTGATGATGCTATCAACGGTTGTGCG-<br/>                     GTGTTTTTTGGTTGCTCAAGGTATGAATTCGCCGAAGAATACACTTTGGAAAAGAT-<br/>                     CATTAAAGACTGCGTCGAAGTACTTTGAGAATCTTGCAATCTTGCTTGAAGTCCAAG-<br/>                     ACCGTTAAGAAGGTTGTTTACACTTCTTCTGCTGATGCTGCCATGATGATTTCTAATT-<br/>                     TGAAGGCCGTAAGAAGAAATCGACGAAACCAATTTGGTCTGAAGTCGATAACTTCATCTC-<br/>                     TAAGCCAGAACAAGTTATTCAGGTTGGCCATCTTACGTTGTTTTCTAAGGTTTGGACC-<br/>                     GAAAGAGCCTGTTTGAAGTTCTCTGAAGAACATGGTTGGATGTTGTTACCATTTTGC-<br/>                     CACCATTGGTTGTTGGTCTTTTATTACTCCACATCCACCACCATCTGTTTCCATTGCT-<br/>                     TTGCTTATTATCTCCGGTGTGCTCTATGATGTTGGGTGTAGATTGGAAAACGCCG-<br/>                     TTCATATTGATGATGTTGCTTTGGCCATATCTTCGTTTTCGAATGTGAAAAGCTAA-<br/>                     GGGTAGACACATCTGCTCCTCTGTTGATTTCCAATGCATGATTTGCCAAGTTTATC-<br/>                     TCTGAAAAC TACCAGAAATCAACGTTCCAACCGATTGTTGAAGGACATCGAAGAAC-<br/>                     AAGAACCAGTTCAATTTGCTCCGATAAGTTGTTGCTATGGGTTTCCAATTCAGATA-<br/>                     CGACTTCGCTGAAATTTTCGGTGTGCTATTAGATGCGCTAAAGAAAAGGTTTCTTG-<br/>                     TAA</p>                                    |
| PsMT2  | Codon-optimized                             | <p>ATGGAATCCACTTGGAAATCCCAAGAACAAGAAATGAAGTACCAATCCCAAATCTGG-<br/>                     AATCAAATCTGCGGTACTGTTGATACCTCTGTTTTGAGATGTGCTATCCAATTTGGGTA-<br/>                     TTTTCGATGCCATTCATAACTCTGGTAAGCCAATGATTACCTTGACCGAATTTCCATC-<br/>                     CATAGTCTCTTCCATCCTCCTCTTCTATTGAACCATGTAACCTGTACAGATTGGTCA-<br/>                     GATACCTGTCCCAAATGGACTTGATTTCTATCGGTGAATGTTGAACGAAGCCACTGT-<br/>                     TTCTTTGACTGGTACTTCTAAGTTGTTGTTGAGAAAATCAAGAAAAGTCCCTGATCGAT-<br/>                     TGGGTTTTGGCTATTTCTTGGCAAATGATGGTTGTTGCTGGCAGCAATTTATCCTCTT-<br/>                     CAGTTTCTACTCCAGTGTGAACCACCAATTTTCCAAAAGTTTCAATGGTAAGAACGC-<br/>                     TTTGGAATTTGGCTGGTGAATTTCCAGAATGGAACGATTTGATTAACAACGCTATGACT-<br/>                     TCTGACACCTCTGTTACAAAACCAAGCTTTGATTCAAGGTTGCGGTAAGATTTTGAACG-<br/>                     GTGTTACCTCTTTGATTGATGTTGGTGGTGGTGCATGGTGTACTATGGCTTATATCGT-<br/>                     TGAAGCTTTCCACATATTAAGGGTGCCGTTATTGATTTGCCACATGTTGTTGAAGCT-<br/>                     GCTCCAGAAGACAGGTTGAAATTCATTTCTGGTGACATCTTCAAGTCTATCTCTA-<br/>                     ACGCTGATGCTGTCTTGTGAAATACGCTCTGCATAACTGGGAAGATACCGAATGTGT-<br/>                     TAACTTGTGAAGAGATGCAAAGAAGCTGTTCCAGCAGATAAGGGTAAGTTATTAT-<br/>                     CATGGATTTGGTTATCGATGACGACGACAACTCTATTTGACCCAAGCTAAATTTGTCC-<br/>                     TTGGATTTGACCGTTATGAATCACGGTGGTGGTAGAGAAAAGAAAAGAAAGATTGG-<br/>                     AGAACTTGATCGAAATGTCGGTTTTTCCAGACACGAAATATTCCAATTTCCGCCA-<br/>                     TGCCATCTATTATCGTTGCTTACCATAA</p> |
| PsMT3  | Codon-optimized                             | <p>ATGGAAGTTGTCTCCAAGATCGATCAAGAAAATCAAGCCAAGATCTGGAAGCAAAT-<br/>                     TTCGGTTTTGCTGAATCCTTGGTTTTGAAGTGTGCTGTTCAATTTGAAATTTGCCGAAA-<br/>                     CCTTGCAATAACAACGTTAAGCCAATGTCCTTGTCTGAATTTGGCTTCTAAATTTGCCAGC-<br/>                     TCAACCAGTTAACAAGATAGATTATACAGAATCTTGCACTTCTTGGTCCACATGAAG-<br/>                     TTGTTTAAACAAGGATGCTACTACCCAAAAGTACTCTTTAGCTCCACCAGCTAAATACT-<br/>                     TGTTGAAAGTTGGGAAAAGTCCATGGTTCCATCCATTTTGTCTGTTACCGATAAGGA-<br/>                     TTTTACTGCTCCATGGAATCATTTGGGTGATGGTTTACTGGTAACTGTAATGCTTTT-<br/>                     GAAAAGGCTTTGGTAAGGGTATCAGAGTCTACATGAGAGAAAATCCAGAAAAGGAC-<br/>                     CAATTTATCAACGAAGGTATGGCTTGCATACCAGATTATTGCTCTGCTTTGGTTA-<br/>                     ACGAATGCAAGTCCATTTTCTCCGATGGTATTAACACTTTGGCTGGTGTGGTAGAGG-<br/>                     TACTGGTACTGCTGTTAAGGCTATTTCTAAAGCTTTCCAGATATCAAGTGCACCATT-<br/>                     CATGATTTGCCAGAAGTTACCTCTAAGAACTCCAAGATTTCCAAGAGATGTTTCAAGT-<br/>                     CTGTTCCATCTGCTGATGCCATTTTCATGAAGTCTATATTGCACGAATGGAACGACGA-<br/>                     AGAATGCATCCAAATTTTGAAGAGATGCAAAGAAGCCATTTCCAAGGGTGGTAAGGT-<br/>                     TATTATTGCCGATGTTGTTATCGATATGGATTCCACTCATCCATACTCCAAATCAAGA-<br/>                     TTGGCTATGGGATTTGGCCATGATGTTGCATCTGGTGGTAAAGAAAAGCCGAAGAA-<br/>                     GATTGGAAGAAGTTGATTGACGCTGCTGGTTTTGCTTCTTGAAGATTACAAAATGT-<br/>                     CCGCCTGCAATCCGTTATTGAAGCTTATCCACATTAA</p>                                                                            |

**Table S3. Cont.**

| Gene                       | Codon-optimized<br>or GenBank accession no. | DNA sequence                                                                                                                                                                                                                                                                                                                                                                                                                                                                                                                                                                                                                                                                                                                                                                                                                                                                                                                                                                                                                                                                                                                                                                                                                                                                                                                                                                                                                                                                                                                                                                                                                                                                                                                                                                                                                                                                                        |
|----------------------------|---------------------------------------------|-----------------------------------------------------------------------------------------------------------------------------------------------------------------------------------------------------------------------------------------------------------------------------------------------------------------------------------------------------------------------------------------------------------------------------------------------------------------------------------------------------------------------------------------------------------------------------------------------------------------------------------------------------------------------------------------------------------------------------------------------------------------------------------------------------------------------------------------------------------------------------------------------------------------------------------------------------------------------------------------------------------------------------------------------------------------------------------------------------------------------------------------------------------------------------------------------------------------------------------------------------------------------------------------------------------------------------------------------------------------------------------------------------------------------------------------------------------------------------------------------------------------------------------------------------------------------------------------------------------------------------------------------------------------------------------------------------------------------------------------------------------------------------------------------------------------------------------------------------------------------------------------------------|
| CYP82X2                    | Codon-optimized                             | <p>ATGAAGTCGTTAATGATGAACAAGTTATTATTTCTCCAACGGATTACTGATTCTCCTT-<br/>CGACCACCATTATCAGTACTTTTATTGTTACAATAATATCCATTGTTTTTCTCTACACT-<br/>GTCTTGTGATAAGGACGACTAAGAATAAGCAGAAGATAGCAGCACCAAAAGCATCG-<br/>GGGGCGTGGCCGTTTCATAGGTCATCTCAAACATTTTCATGAAACAAGATACTCAGTTT-<br/>ACAGAACTCTAGGAACCATGTCTGATAAATACGGGTCGGTGTTCACACTTCGATTAG-<br/>GAAACCAAGCAATCCTAGTTGTGAGCAACTGGGAGATGGTAAAAGAATGTTTCACAA-<br/>CAAACGACAGTCATTCGAAATCGTCCAAGTACGTTAAGCACTAAATACATGCTGAA-<br/>TGACACTAATTTCTGTCGTGTTTTACCTTACGGAACTGTTGGAGAGAAAATGCGGAAG-<br/>ATATTGGTGCAAAAACCTACTGATCTCTAACCAAAGATCAGAGGCATTGAAAAATCTGA-<br/>AAACGAAAGAAAATCGACAACTCGTTTGTAAAGCTTAATGATTTATGCAACAACGATGT-<br/>CAGTGGAGGAGGCACAAAAGTTAGGATGGACGAATGGTGGCTGACATGATGTTCAA-<br/>CATTATGTAGGATTACATTTGGTTACCAAAGCGGAGGAGGCGATGCACCTGGCGC-<br/>TTCTACAACATCCAAGAAATGTCGAGAGATACAAGAAAACGTTGGACGAGATGTTTGT-<br/>GTTTTAGCGACGAGGTTTGCAGTTTCAGATATATTTCCATCTCTGGAGTTTATAGACC-<br/>GATTGAGAGGTCCTGTAAGGATATGAAAATCTTGGGAGACGAATTAACCTCATTG-<br/>CTGGATGTTTTATGAAAGAACATCGTCAAAGAGACGAGAATCATTCCTCATTGTT-<br/>ATCTTTGTCAAATGAATCCGTTGGTGATGAACAAGATTTTCATTGATGTTCTCTGTCA-<br/>ATAATGGATCAGTCACGGCTTCCCGGAGATGACCCAGATTTTATTATCAAAAATATGA-<br/>TCCTGGAAGCTTTGTCAGGTGGGACGGACAGTTTAAGTGC AACCTTAACCTGGGTCC-<br/>TCTCTACTGCTGAACCACCCAAAACGTTTAAAGAGGGCAAGGAGGAAAATAGATA-<br/>GGCATGTGGAAAACGGTAAGCAAGTGAAGTGTCTGATATTCGAAGCTCGGATACA-<br/>TTGATGCAATAATCAAAGAGACGATGAGATTGTATCCAGTCGGAGCATTAAAGCGAAC-<br/>GATACCGACTGAAGAATGCGAGGTTGGTCGGTTTAAACGTACCCGCTGGCACACGCT-<br/>TACTGGTGAATATATGGAAGATCCACAGAGACCCAAGTGTGTGGGAGAATCCATCAG-<br/>ATTTTCAACCAGAGAGGTTTTTGTGCAGCGATAAGGTGGGTGTGGATTTATATGGCC-<br/>AGAATTATGAGCTGATACCATTGTTGGGCGCGTAGGAGGGTATGTCGGCTATAGTTT-<br/>CATCTGACAGCATGTCATTATGCGTTGGGCGCTCTTATCAAGGATATGAAATGAA-<br/>ATCAGCCAGCCTCGATGGGAAGGTGAATATGGAAGAAAATGATAGCCATGTCGTGCCA-<br/>CAAGATGAGCCCTCTGAAGTTATTATCAGTCCTCGGGAGCCGAGGCGGAGTTAA</p> |
| N-terminal truncated CjNCS | Codon-optimized                             | <p>ATGAACGGTAGACCTTTGTTGCACAGAGTCACCAAGAAGAACTGTTATGTTGTACC-<br/>ACGAATTGGAAGTTGCTGCTTCTGCTGATGAAGTTTGGCTGTTGAAGTTCTCCAGA-<br/>ATTGGGTTTACATTTGCCAGATTTGTTGCCAGCTGGTATTTTGGCAAGTTCGAAATT-<br/>ACTGGTGATGGTGGTGAAGGTTCCATTTTGGATATGACTTTTCCACCAGGTCAATTCC-<br/>CACATCATTACAGAGAAAAGTTCGTCTTTTTCGACCACAAGAACAGATAACAAGTTGGT-<br/>CGAACAAAATCGATGGTGATTTCTTCGATTTGGGTGTTACTTACTACATGGATACCATT-<br/>AGAGTTGTTGCTACTGGTCCAGATTCTTGCCTTATTAAGTCTACTACTGAATACCAG-<br/>TCAAGCCAGAATTTGCTAAAATCGTTAAGCCATTGATCGATACCGTTCATTGGCTAT-<br/>TATGTCTGAAGCTATTGCCAAGGTCGTCTGGAAAACAACATAAGTCATCTGAAATGA</p>                                                                                                                                                                                                                                                                                                                                                                                                                                                                                                                                                                                                                                                                                                                                                                                                                                                                                                                                                                                                                                                                                                                                                                                                                                                                                                         |

Table S3. Cont.

| Gene               | Codon-optimized<br>or GenBank accession no. | DNA sequence                                                                                                                                                                                                                                                                                                                                                                                                                                                                                                                                                                                                                                                                                                                                                                                                                                                                                                                                                                                                                                                                                                                                                                                                                                                                                                                                                                                                                                                                                                                                                                                                                                                                                                                                                                                                                                                                                                                                                                                                                                                                                                                                                                                                                                 |
|--------------------|---------------------------------------------|----------------------------------------------------------------------------------------------------------------------------------------------------------------------------------------------------------------------------------------------------------------------------------------------------------------------------------------------------------------------------------------------------------------------------------------------------------------------------------------------------------------------------------------------------------------------------------------------------------------------------------------------------------------------------------------------------------------------------------------------------------------------------------------------------------------------------------------------------------------------------------------------------------------------------------------------------------------------------------------------------------------------------------------------------------------------------------------------------------------------------------------------------------------------------------------------------------------------------------------------------------------------------------------------------------------------------------------------------------------------------------------------------------------------------------------------------------------------------------------------------------------------------------------------------------------------------------------------------------------------------------------------------------------------------------------------------------------------------------------------------------------------------------------------------------------------------------------------------------------------------------------------------------------------------------------------------------------------------------------------------------------------------------------------------------------------------------------------------------------------------------------------------------------------------------------------------------------------------------------------|
| TyrH <sup>WR</sup> | Codon-optimized                             | <p>ATGCCAACTCCATCTGCTCCATCTCCACAACCAAGGGTTTCAGAAGAGCTGTTTCTG-<br/>                     AACAAAGACGCTAAGCAAGCTGAAGCTGTTACTTCTCCAAGATTCATCGGTGAAGAAC-<br/>                     AATCTTTGATCGAAGACGCTAGAAAGGAAAGAGAAGCTGCTGCTGCTGCTGCTG-<br/>                     CTGCTGTTGCTTCTTCTGAACCAGGTAACCCATGGAAGCTGTTGTTTTTCAGAAGAGA-<br/>                     AGAAAGAGACGGTAACGCTGTTTTGAACCTGTTGTTCTCTTTGAGAGGTAAGCCA-<br/>                     TCTTCTTTGCTAGAGCTGTTAAGGTTTTCGAACTTTCGAAGCTAAGATCCACCCT-<br/>                     TGAAACTAGACCAGCTCAAAGACCATTGGCTGGTCTCCACACTTGGAACTTTCGT-<br/>                     TAGATTCGAAGTCCATCTGGTGACTTGGCTGCTTTGTTGCTTCTGTTAGAAAGATT-<br/>                     TCTGACGACGTTAGATCTGCTAGAGAAGACAAGGTTCCATACTTCCCAAGAAAGTTT-<br/>                     CTGAATTGGACAAGTGTACCACCTGGTTACTAAGTTCGACCCAGACTTGGACTTGA-<br/>                     CCACCAGGTTTCTTGACCAAGTTTACAGACAAGAAGAAAGTTGATCGCTGAAATC-<br/>                     GCTTTCCAATACAAGCACGGTGAACCAATCCACACGTTGAATACACTGCTGAAGAA-<br/>                     ATCGCTACTTGGAAAGGAGTTTACGTTACTTTGAAGGGTTGTACGCTACTCACGCTT-<br/>                     GTAGAGAACACTTGGAAAGGTTTCCAATTGTTGAAAGATACTGTGGTTACAGAGAAG-<br/>                     ACTCTATCCACAATTGAAGACGTTTCTAGATTCTTGAAGGAAAGAAGTGGTTTCCA-<br/>                     ATTGAGACCAGTTGCTGGTTTTGTTGCTGCTAGAGACTTCTTGGCTTCTTTGGCTTTC-<br/>                     AGAGTTTTCCAATGTACTCAATACATCAGACACGCTTCTTCTCCAATGCACCTCCAG-<br/>                     AACCAGACTGTTGTCACGAATTGTTGGGTCACGTTCCAATGTTGGCTGACAGAAGTTT-<br/>                     CGCTCAATTCTCTCAAGACATCGGTTTGGCTTCTTTGGGTGCTTCTGACGAAGAAATC-<br/>                     GAAAAGTTGCTACTGTTTACTGGTTCACGTTGAAATTCGGTTTTGTGTAAGCAAAACG-<br/>                     GTGAATTGAAGGCTTACGGTGCTGGTTTTGTTGCTTCTTACGGTGAATTGTTGCACCTC-<br/>                     TTTGCTGTAAGAACCAGAAGTTAGAGCTTTCGACCCAGACACTGCTGCTGTTCAACCA-<br/>                     TACCAAGACCAAACTTACCAACCAGTTTACTTCGTTTTCTGAATCTTCAACGACGCTA-<br/>                     AGGACAAGTTGAGAACTACGCTTCTAGAATCCAAAGACCATTCTCTGTTAAGTTCGA-<br/>                     CCCATACACTTTGGCTATCGACGTTTGGACTCTCCACACTATCCAAAGATCTTTG-<br/>                     GAAGGTGTTCAAGACGAATTGCACACTTTGGCTCACGCTTTGCTGCTATCTCTTGA</p> |
| ARH1               | KZV12618.1                                  |                                                                                                                                                                                                                                                                                                                                                                                                                                                                                                                                                                                                                                                                                                                                                                                                                                                                                                                                                                                                                                                                                                                                                                                                                                                                                                                                                                                                                                                                                                                                                                                                                                                                                                                                                                                                                                                                                                                                                                                                                                                                                                                                                                                                                                              |
| IDP1               | KZV12165.1                                  |                                                                                                                                                                                                                                                                                                                                                                                                                                                                                                                                                                                                                                                                                                                                                                                                                                                                                                                                                                                                                                                                                                                                                                                                                                                                                                                                                                                                                                                                                                                                                                                                                                                                                                                                                                                                                                                                                                                                                                                                                                                                                                                                                                                                                                              |
| IDP2               | KZV09419.1                                  |                                                                                                                                                                                                                                                                                                                                                                                                                                                                                                                                                                                                                                                                                                                                                                                                                                                                                                                                                                                                                                                                                                                                                                                                                                                                                                                                                                                                                                                                                                                                                                                                                                                                                                                                                                                                                                                                                                                                                                                                                                                                                                                                                                                                                                              |
| IDP3               | KZV08616.1                                  |                                                                                                                                                                                                                                                                                                                                                                                                                                                                                                                                                                                                                                                                                                                                                                                                                                                                                                                                                                                                                                                                                                                                                                                                                                                                                                                                                                                                                                                                                                                                                                                                                                                                                                                                                                                                                                                                                                                                                                                                                                                                                                                                                                                                                                              |
| PDC1               | KZV09290.1                                  |                                                                                                                                                                                                                                                                                                                                                                                                                                                                                                                                                                                                                                                                                                                                                                                                                                                                                                                                                                                                                                                                                                                                                                                                                                                                                                                                                                                                                                                                                                                                                                                                                                                                                                                                                                                                                                                                                                                                                                                                                                                                                                                                                                                                                                              |
| PDC6               | KZV11313.1                                  |                                                                                                                                                                                                                                                                                                                                                                                                                                                                                                                                                                                                                                                                                                                                                                                                                                                                                                                                                                                                                                                                                                                                                                                                                                                                                                                                                                                                                                                                                                                                                                                                                                                                                                                                                                                                                                                                                                                                                                                                                                                                                                                                                                                                                                              |
| ALD4               | KZV08266.1                                  |                                                                                                                                                                                                                                                                                                                                                                                                                                                                                                                                                                                                                                                                                                                                                                                                                                                                                                                                                                                                                                                                                                                                                                                                                                                                                                                                                                                                                                                                                                                                                                                                                                                                                                                                                                                                                                                                                                                                                                                                                                                                                                                                                                                                                                              |
| ALD6               | KZV07457.1                                  |                                                                                                                                                                                                                                                                                                                                                                                                                                                                                                                                                                                                                                                                                                                                                                                                                                                                                                                                                                                                                                                                                                                                                                                                                                                                                                                                                                                                                                                                                                                                                                                                                                                                                                                                                                                                                                                                                                                                                                                                                                                                                                                                                                                                                                              |
| TYR1               | KZV13247.1                                  |                                                                                                                                                                                                                                                                                                                                                                                                                                                                                                                                                                                                                                                                                                                                                                                                                                                                                                                                                                                                                                                                                                                                                                                                                                                                                                                                                                                                                                                                                                                                                                                                                                                                                                                                                                                                                                                                                                                                                                                                                                                                                                                                                                                                                                              |

**Table S4. Tyrosine derivatives tested in this study in addition to 3-halo-tyrosines**

| Name                                                               | PubChem CID | Structure |
|--------------------------------------------------------------------|-------------|-----------|
| 3-amino-L-tyrosine                                                 | 160450      |           |
| 3-nitro-L-tyrosine                                                 | 65124       |           |
| $\alpha$ -methyl-L-tyrosine                                        | 441350      |           |
| 3-O-methyl-DOPA                                                    | 13206354    |           |
| 3-(hydroxymethyl)- L-tyrosine                                      | 10081872    |           |
| 2-amino-3-hydroxy-3-(4-hydroxyphenyl)propanoic acid                | 13309269    |           |
| 2-amino-3-(3-tert-butyl-4-hydroxyphenyl)propanoic acid             | 18352476    |           |
| (2S)-2-amino-3-[4-hydroxy-3-(phosphonomethyl)phenyl]propanoic acid | 15045708    |           |
| 2-amino-3-(3-ethyl-4-hydroxyphenyl)-2-methylpropanoic acid         | 18544337    |           |
| D- $\alpha$ -methyl DOPA                                           | 721860      |           |
| 3-(2-Amino-2-carboxyethyl)benzoic acid                             | 265274      |           |
| L-m-tyrosine                                                       | 6950578     |           |
| 4-aminophenylalanine                                               | 95174       |           |
| 2-amino-3-(3,4,5-trihydroxyphenyl)propanoic acid                   | 22283619    |           |
| 3-carboxytyrosine                                                  | 583884      |           |



**Table S5. MRM transitions used to quantify alkaloids in LC-MS/MS analysis**

| Compound                                        | Quantifier MRM transition |            |                  | Qualifier MRM transition |            |                  |
|-------------------------------------------------|---------------------------|------------|------------------|--------------------------|------------|------------------|
|                                                 | Precursor → product ion   | Fragmentor | Collision energy | Precursor → product ion  | Fragmentor | Collision energy |
| Reticuline                                      | 330 → 192                 | 120        | 19               | 330 → 137                | 120        | 31               |
| Scoulerine                                      | 328 → 151                 | 135        | 30               | 328 → 178                | 135        | 29               |
| Tetrahydrocolumbamine                           | 342 → 178                 | 135        | 29               | 342 → 163                | 135        | 29               |
| Noscapine                                       | 414 → 220                 | 138        | 23               | 414 → 353                | 138        | 23               |
| Canadine                                        | 340 → 176                 | 135        | 29               | 340 → 149                | 135        | 25               |
| <i>N</i> -methylcanadine                        | 354 → 190                 | 135        | 25               | 354 → 188                | 135        | 25               |
| 1-Hydroxy- <i>N</i> -methylcanadine             | 370 → 206                 | 135        | 25               | –*                       | –*         | –*               |
| 1,13-Dihydroxy- <i>N</i> -methylcanadine        | 386 → 206                 | 135        | 25               | –*                       | –*         | –*               |
| 1-Hydroxy-13-O-acetal- <i>N</i> -methylcanadine | 428 → 206                 | 135        | 25               | 428 → 368                | 135        | 25               |
| 4'-O-desmethyl-3-O-acetylpapaveroxine           | 444 → 206                 | 138        | 23               | 444 → 398                | 138        | 23               |
| Narcotolinehemiacetal                           | 402 → 206                 | 138        | 23               | –*                       | –*         | –*               |
| Narcotoline                                     | 400 → 206                 | 138        | 23               | 400 → 339                | 138        | 23               |

\*The qualifier transitions of 1-hydroxy-*N*-methylcanadine, 1,13-dihydroxy-*N*-methylcanadine, and narcotolinehemiacetal are not determined; the identities of 1-hydroxy-*N*-methylcanadine, 1,13-dihydroxy-*N*-methylcanadine, and narcotolinehemiacetal are confirmed by the retention time.
